## 1 Title

2 Display of malaria transmission-blocking antigens on chimeric duck hepatitis B virus-derived  
3 virus-like particles produced in *Hansenula polymorpha*

4  
5 Short title

6 Display of malaria TBV candidates on VLP

## 7 Authors

8 Wetzel, David<sup>1,2,\*</sup>; Chan, Jo-Anne<sup>3</sup>; Suckow, Manfred<sup>1</sup>; Barbian, Andreas<sup>4</sup>; Weniger, Michael<sup>1</sup>;  
9 Jenzelewski, Volker<sup>1</sup>; Reiling, Linda<sup>3</sup>; Richards, Jack S<sup>3</sup>; Anderson, David A<sup>3</sup>; Kouskousis,  
10 Betty<sup>3</sup>; Palmer, Catherine<sup>3</sup>; Hanssen, Eric<sup>5</sup>; Schembecker, Gerhard<sup>2</sup>; Merz, Juliane<sup>6</sup>; Beeson,  
11 James G<sup>3,7,8</sup>; Piontek, Michael<sup>1</sup>

## 12 Affiliations

13 <sup>1</sup> ARTES Biotechnology GmbH, Langenfeld, Germany

14  
15 <sup>2</sup> Laboratory of Plant and Process Design, Technical University of Dortmund, Germany

16  
17 <sup>3</sup> Burnet Institute for Medical Research and Public Health, Melbourne, Victoria, Australia

18  
19 <sup>4</sup> Düsseldorf University Hospital, Institute for anatomy I, Düsseldorf, Germany

20  
21 <sup>5</sup> The Bio21 Molecular Science and Biotechnology Institute, University of Melbourne,  
22 Victoria, Australia

23  
24 <sup>6</sup> Evonik Technology & Infrastructure GmbH, Hanau, Germany

25  
26 <sup>7</sup> Central Clinical School and Department of Microbiology, Monash University, Victoria,  
27 Australia

28  
29 <sup>8</sup> Department of Medicine, Royal Melbourne Hospital, University of Melbourne, Victoria,  
30 Australia

31  
32 \* Corresponding author

33 E-Mail: [d.wetzel@artes-biotechnology.com](mailto:d.wetzel@artes-biotechnology.com) (DW)

34  
35  
36

## 37 **1. Abstract**

### 38 Background:

39 Malaria caused by *Plasmodium falciparum* is one of the major threats to human health globally.  
40 Despite huge efforts in malaria control and eradication, highly effective vaccines are urgently  
41 needed, including vaccines that can block malaria transmission. Chimeric virus-like particles  
42 (VLP) have emerged as a promising strategy to develop new malaria vaccine candidates.

### 43 Methods:

44 We developed yeast cell lines and processes for the expression of malaria transmission-  
45 blocking vaccine candidates Pfs25 and Pfs230 as VLP and VLP were analyzed for purity, size,  
46 protein incorporation rate and expression of malaria antigens.

### 47 Results:

48 In this study, a novel platform for the display of *Plasmodium falciparum* antigens on chimeric  
49 VLP is presented. Leading transmission-blocking vaccine candidates Pfs25 and Pfs230 were  
50 genetically fused to the small surface protein (dS) of the duck hepatitis B virus (DHBV). The  
51 resulting fusion proteins were co-expressed in recombinant *Hansenula polymorpha*  
52 (syn. *Pichia angusta*, *Ogataea polymorpha*) strains along with the wild-type dS as the VLP  
53 scaffold protein. Through this strategy, chimeric VLP containing Pfs25 or the Pfs230-derived  
54 fragments Pfs230c or Pfs230D1M were purified. Up to 100 mg chimeric VLP were isolated  
55 from 100 g dry cell weight with a maximum protein purity of 90 % on the protein level.  
56 Expression of the Pfs230D1M construct was more efficient than Pfs230c and enabled VLP  
57 with higher purity. VLP showed reactivity with transmission-blocking antibodies and supported  
58 the surface display of the malaria antigens on the native VLP.

### 59 Conclusion:

60 The incorporation of leading *Plasmodium falciparum* transmission-blocking antigens into the  
61 dS-based VLP scaffold is a promising novel strategy for their display on nano-scaled particles.  
62 Competitive processes for efficient production and purification were established in this study.

## 63            **2. Background**

64    Malaria is one of the world's deadliest human diseases with nearly half of the global population  
65    living at risk. There were an estimated 216 million cases and 445,000 deaths due to malaria in  
66    2016 [1]. This life-threatening disease is caused by *Plasmodium* parasites and is transmitted  
67    via the bite of infected female *Anopheles* mosquitoes. The majority of malaria is caused by *P.*  
68    *falciparum*, with *P. vivax* being a second major cause of disease [1]. Despite substantial  
69    financial investment, US\$ 2.7 billion in 2016, and decades of intense research and  
70    development, only one malaria vaccine has progressed through phase 3 clinical trials and is  
71    now undergoing phase 4 implementation trials (RTS,S; Mosquirix™). However, vaccine  
72    efficacy in phase III clinical trials was low in young children (up to 50% efficacy in the first year,  
73    but waning over 18 months) [2]. The World Health Organization has set a strategic goal of  
74    developing vaccines with at least 75% efficacy [3], including the development of vaccines that  
75    block malaria transmission [1]. Various approaches are under investigation including whole  
76    parasite vaccines and subunit vaccines that are composed of defined, purified antigens or their  
77    sub-domains [4]. Subunit vaccines have the potential to use established technologies and  
78    processes for low-cost production and distribution through existing vaccine delivery  
79    mechanisms [5]. A variety of *Plasmodium* antigens are currently under investigation as  
80    potential subunit vaccine components and can be classified into one of the following groups  
81    based on *Plasmodium* lifecycle stages [6]: i) pre-erythrocytic antigens (e.g. CSP [7]); ii) blood-  
82    stage antigens [8]; iii) transmission-stage antigens (e.g. Pfs25, Pfs230 [9–11]).

83  
84    Unfortunately, subunit vaccine candidates often suffer from weak immunogenicity that has to  
85    be compensated by smart formulation and/or delivery strategies [12] such as virus-like  
86    particles (VLP [13,14]). Since the 1980's, VLP have been approved for use as safe and  
87    effective subunit vaccines against several pathogens [15]. They can also be used as a scaffold  
88    for the incorporation of antigens derived from foreign pathogens to enhance their immunogenic  
89    potential (chimeric VLP [16]). Accordingly, the RTS,S vaccine contains chimeric VLP with a

90 truncated construct of CSP, the major surface antigen expressed on sporozoites during the  
91 pre-erythrocytic stage. However, its efficacy was low in young children; approaches are  
92 urgently needed to develop highly efficacious vaccines to improve malaria control and  
93 elimination [2,17], such as the inclusion of additional antigens.

94

95 Recently, there has been a renewed focus of malaria vaccine development on transmission  
96 stage antigens, and transmission-blocking activity is a stated priority in the WHO Malaria  
97 Vaccine Technology Roadmap [3]. Transmission-blocking vaccines (TBV) are thought to act  
98 by inhibiting the transmission of malaria from humans to the mosquito vector, largely through  
99 the action of antibodies taken up in the mosquito's blood-meal [18]. Leading vaccine  
100 candidates that are expressed during the transmission stages of *P. falciparum* include Pfs25  
101 [9] and Pfs230 [10,19]. Both antigens have been shown to generate antibodies that are capable  
102 of blocking transmission through standard membrane feeding assays [20–22]. Pfs230 is  
103 expressed on gametocytes and gametes and is a target of naturally-acquired antibodies from  
104 malaria-exposed populations, whereas Pfs25 is only expressed by zygotes and ookinetes in  
105 the mosquito stage and, therefore, naturally-acquired immunity is not generated [18]. However,  
106 the development of TBV remains challenging.

107

108 The recombinant production and folding of Pfs25 is difficult because it is cysteine-rich and  
109 contains four tandem epidermal growth factor (EGF)-like domains [21]. Nevertheless, success  
110 has been achieved with yeast-derived versions of Pfs25 that are emerging as prominent TBV  
111 candidates [23–25]. However, the immunogenicity of Pfs25 is weak [26], but can be enhanced  
112 by construction of fusion proteins [27–29] or by VLP or non-VLP nanoparticle-based  
113 approaches [30–35]. The 363 kDa Pfs230 is a large and complex protein that is predicted to  
114 contain multiple cysteine-rich domains [36,37]. Its potential as a transmission-blocking vaccine  
115 candidate was identified in the 1980s [10,19]. However, recombinant production of full-length  
116 Pfs230 has not been accomplished to the present time. Therefore, research has focused on  
117 truncated Pfs230 versions named Pfs230c [22] and Pfs230D1M [38]. These variants were

118 shown to retain the property to elicit transmission-blocking antibodies and can be produced as  
119 recombinant antigens [22,38,39]. The Pfs230c construct contains the first two protein domains.  
120 Expression studies of Pfs230 in yeast led to the development of the shortened Pfs230D1M  
121 construct, which includes only the first domain, and could be efficiently expressed in *Pichia*  
122 *pastoris* [38].

123

124 Despite progress that has been made towards effective malaria vaccines, novel protein  
125 conjugation strategies and delivery platforms as well as the use of strong adjuvants may be  
126 essential to meet the goals of the malaria control and eradication agenda set by the World  
127 Health Organization [40]. Our present study introduces a new platform for the display of the  
128 malaria transmission-blocking vaccine candidates Pfs25 [25], Pfs230c [22] and Pfs230D1M  
129 [38] on the surface of chimeric VLP. The small surface protein (dS) of the duck hepatitis B virus  
130 (DHBV) was used as VLP scaffold [41,42]. The *P. falciparum* transmission stage antigens were  
131 genetically fused to the dS and the resulting fusion proteins were co-expressed with non-fused  
132 wild-type dS in recombinant strains of the methylotrophic yeast *Hansenula polymorpha*  
133 (*H. polymorpha*, syn. *Pichia angusta*, *Ogataea polymorpha*, [43]) which allowed the isolation  
134 of chimeric VLP composed of wild-type dS and the respective fusion protein. In contrast to  
135 previous VLP platforms, the dS-based VLP scaffold allows the stable incorporation of a variety  
136 of large molecular weight (MW) foreign antigens. In combination with the yeast expression  
137 system, this technology is highly productive and not limited to small scale fundamental  
138 research [44]. Thus, the key challenges in the field of chimeric VLP development are met  
139 [13,14,45] which makes this platform an attractive and competitive alternative to previously  
140 described VLP platforms [30–33]. Furthermore, expression of transmission-blocking antigens  
141 as VLP may enable the future co-formulation of these with RTS,S in multistage vaccines.

142

## 143 **3. Materials and methods**

### 144 **3.1. Genes, plasmids and strains**

145 Fusion proteins were designed by *N*-terminal fusion of malaria antigens to the VLP scaffold  
146 protein dS. Open reading frames (ORF) encoding the fusion proteins were synthesized by  
147 GeneArt/Life Technologies (Regensburg, Germany). They were codon-optimized for  
148 heterologous expression in *H. polymorpha* and flanked by *EcoRI* and *BamHI* restriction sites.  
149 Synthesized ORF were inserted between the *EcoRI* and *BamHI* sites of a derivative of the  
150 *H. polymorpha* expression plasmid pFPMT121 [46] which carried the *LEU2* instead *URA3*  
151 gene for selection in yeast. The sequences of the ORF post subcloning were confirmed by  
152 sequencing prior to yeast transformation. Cloning was done in bacterial strain *Escherichia coli*  
153 NEB® 10-beta (New England Biolabs, Frankfurt a. M., Germany) grown at 37 °C in lysogeny  
154 broth [47] supplemented with 60 mg L<sup>-1</sup> ampicillin (Applichem, Darmstadt Germany).  
155 The auxotrophic *H. polymorpha* strain ALU3 (relevant genotype: *ade1*, *leu2*, *ura3*) [48] derived  
156 from wild type strain ATCC® 34438™ (CBS 4732, IFO 1476, JCM 3621, NBRC 1476, NCYC  
157 1457, NRRL Y-5445) was used as expression host. Recombinant yeast cell lines were  
158 generated by electroporation [49] and a subsequent strain generation and isolation protocol  
159 [50]. Thereby, the expression plasmids integrated genomically stable in different copy numbers  
160 into the host genome. Heterologous yeast strains were stored as glycerol stocks at – 80 °C.  
161 Recombinant *H. polymorpha* strains co-producing the dS and a fusion protein were generated  
162 by the “staggered transformation approach” and screened as previously described [44].

163

### 164 **3.2. Yeast cell mass generation**

#### 165 **3.2.1. Shake flask**

166 VLP composed of Pfs230D1M-dS and dS were purified from cell mass of strain Ko#119, grown  
167 in 2 L baffled shake flasks filled with 200 mL YPG medium containing 20 g L<sup>-1</sup> glycerol

168 (AppliChem, Darmstadt, Germany) as carbon source and 0.1 g L<sup>-1</sup> adenine (AppliChem,  
169 Darmstadt, Germany). A pre-culture grown in YPD medium to stationary phase was used as  
170 inoculum. The main cultures were incubated at 37 °C and 130 rpm with 5 cm throw. After 56 h  
171 of derepression, 1 % (v/v) methanol was added to the cultures for induction of target gene  
172 expression. After 72 h total cultivation time, cells were harvested by centrifugation (6,000g,  
173 15 min, 4 °C), washed once with wash buffer (50 mM Na-phosphate buffer, 2 mM EDTA, pH  
174 8.0) and stored at -20 °C.

175

### 176 **3.2.2. Bioreactor**

177 VLP containing the fusion proteins Pfs25-dS or Pfs230c-dS were purified from cell mass of  
178 strain RK#097 or RK#114, respectively. Strains were grown in a 2.5 L scale stirred tank  
179 bioreactor (Labfors 5, Infors, Bottmingen, Switzerland). It was sterilized by autoclaving after  
180 filling with 2.5 L animal component free complex medium containing 20 g L<sup>-1</sup> yeast extract (BD  
181 Biosciences, Heidelberg, Germany), 40 g L<sup>-1</sup> peptone from soymeal (Applichem, Darmstadt  
182 Germany), 10 g L<sup>-1</sup> glycerol, 11 g L<sup>-1</sup> glucose-monohydrate, and 0.1 g L<sup>-1</sup> adenine. Aqueous  
183 solutions of NH<sub>3</sub> (12.5 % (w/w), sterile filtered) and H<sub>3</sub>PO<sub>4</sub> (28 % (w/w), Merck, Darmstadt,  
184 Germany) were used as corrective media to keep pH constant (set point 6.5) throughout  
185 fermentation and Struktol J 673 (10 % (v/v) aqueous solution, Schill+Seilacher, Hamburg,  
186 Germany) was utilized as antifoam agent. Aeration was adjusted to 1 vvm (2.5 NL min<sup>-1</sup>) and  
187 the medium was inoculated to an optical density (OD<sub>600</sub>) of 0.6 using shake flask pre-cultures.

188

189 After a batch phase of 8 h, strain RK#114 was fed continuously with 275 mL of derepression  
190 solution (750 g L<sup>-1</sup> glycerol) over 31 h. Formation of product was then induced by pulse-wise  
191 addition of 100 mL induction solution (285 g L<sup>-1</sup> glycerol and 715 g L<sup>-1</sup> methanol). Cells were  
192 harvested by centrifugation (6000g, 15 min, 4 °C) after 72 h total cultivation time, washed with  
193 wash buffer (25 mM Na-phosphate buffer, 2 mM EDTA, pH 8.0) and stored at -20 °C until  
194 further processing.

195  
196 Strain RK#097 was fed with 160 mL of derepression solution over 36.5 h after the batch phase.  
197 90 mL induction solution were added pulse-wise and fermentation was stopped after 65.2 h  
198 total cultivation time. Cells were harvested and stored as described before.  
199 The dry cell weight (DCW) was quantified using a moisture analyzer (MLS 50-3 HA250, Kern  
200 & Sohn, Balingen, Germany). OD<sub>600</sub> of cell suspensions was determined with a  
201 spectrophotometer (DU 640 Beckman Coulter, Brea, California, USA).

202

### 203 **3.3. Purification of VLP**

204 All VLP preparations were formulated in desalting buffer (8 mM Na-phosphate buffer pH 7,  
205 154 mM NaCl) at concentrations in the range of mg mL<sup>-1</sup>. However, the purification protocols  
206 steps were adjusted for the different chimeric VLP.

207

#### 208 **3.3.1. Purification of Pfs25-dS/dS VLP**

209 Pfs25-dS/dS VLP were purified from strain RK#097 in preparative manner as described before  
210 [44,51]. Briefly, cells were disrupted by six cycles of high pressure homogenization (~1500 bar,  
211 APV 2000, SPX Flow Technology, Unna, Germany) and the cell homogenate was adjusted to  
212 4.5 % (w/w) PEG<sub>6000</sub> and 0.45 M NaCl. After incubation over-night at 4 °C and subsequent  
213 centrifugation (17,000g, 30 min, 4 °C), the product was adsorbed to fumed silica matrix Aerosil  
214 (type 380 V, Evonik, Essen, Germany). The matrix was washed once with 77 mM NaCl  
215 aqueous solution. Desorption buffer (10 mM di-sodium tetraborate decahydrate, 2 mM EDTA,  
216 6 mM deoxycholic acid sodium salt, pH 9.1) was used to remove the product from the Aerosil  
217 (1 h, 25 °C). The desorbed material was applied to ion exchange chromatography (Mustang Q  
218 XT, PALL Life Sciences, Port Washington, New York, United States). Product containing  
219 fractions were pooled and concentrated by ultrafiltration (Minimate™ TFF tangential flow  
220 filtration Capsule Omega 100 k Membrane, PALL, Port Washington, New York, United States)



221 prior to CsCl density gradient ultracentrifugation (1.5 M CsCl) in Optima™ L90K centrifuge  
222 (rotor type: 70.1 Ti, tubes: 16 \* 76 mm, Beckman Coulter, Brea, California, USA) for 65 h at  
223 48,400 rpm and 4 °C. Product containing fractions were pooled, desalted by dialysis (Slyde-A-  
224 Lyzer™ dialysis cassettes, MWCO 20 kDa, Thermo Fisher Scientific, Waltham, USA) against  
225 desalting buffer (8 mM Na-phosphate buffer pH 7, 154 mM NaCl, AppliChem, Darmstadt,  
226 Germany) and 0.45 µm filtered (Filtropur S 0.45 filters, Sarstedt, Nümbrecht, Germany).

227

### 228 **3.3.2.Purification of Pfs230c-dS/dS VLP**

229 The following adjustments were made for the purification of Pfs230c-dS/dS VLP from strain  
230 RK#114: 2.5 % (w/w) PEG<sub>6000</sub> and 0.25 M NaCl were used for clarification of the crude cell  
231 lysate after high pressure homogenization. Following the Aerosil batch adsorption step, the  
232 silica matrix was washed twice applying aqueous solution of 77 mM NaCl and 2.5 mM  
233 deoxycholic acid sodium salt or aqueous solution of 77 mM NaCl. The desorbed material was  
234 then subjected two consecutive times to Capto Core 700 chromatography matrix (GE  
235 Healthcare, Amersham, UK) applying 5 mg protein per ml resin. The unbound product fraction  
236 was concentrated by ultrafiltration and the retentate was applied to CsCl density gradient  
237 ultracentrifugation as described for the Pfs25-dS/dS VLP purification. Product containing  
238 fractions were then pooled and dialyzed against desalting buffer in two steps: first, the CsCl  
239 concentration was reduced to 0.5 M CsCl. Then, 0.05 % (w/v) SDS were added before the  
240 dialysis against desalting buffer was continued. The dialyzed sample was 0.45 µm filtered.

241

### 242 **3.3.3.Purification of Pfs230D1M-dS/dS VLP**

243 The protocol for purifying Pfs230D1M-dS/dS VLP from strain Ko#119 was modified compared  
244 to the purification of Pfs230c-dS/dS VLP from strain RK#114. A 100 mM Na-  
245 carbonate/bicarbonate buffer (pH 9.2) with 1.2 M urea [52] was used for desorption of the

246 product from the fumed silica matrix Aerosil. The desorbate was subjected to only one run of  
247 Capto Core 700 chromatography. Ultrafiltration, CsCl density gradient ultracentrifugation,  
248 dialysis and filtration were performed as described for Pfs25-dS/dS VLP purification from strain  
249 RK#097.

250

### 251 **3.4. Protein, lipid and VLP analysis**

252 Protein concentrations were determined with the Pierce™ BCA protein Assay kit (Thermo  
253 Fisher Scientific, Waltham). Lipid content of VLP preparations was determined based on sulfo-  
254 phospho-vanillin reaction [53] with refined soya oil (Caesar & Loretz GmbH, Hilden, Germany)  
255 used as standard.

256 Sodium dodecyl sulfate polyacrylamide gel electrophoresis (SDS-PAGE) and Western blotting  
257 were performed as previously described [44]. In short: The Criterion™ system from BioRad  
258 (München, Germany) was used to run SDS-PAGE. Cellulose nitrate membranes (Sartorius  
259 Stedim Biotech, Göttingen, Germany) were used for semi dry Western blotting of the proteins.  
260 Membranes were subsequently blocked by 3 % powdered milk in PBS containing 0.05 %  
261 Tween 20 (Pfs230-related Western blots) or Roti®-Block (Carl Roth GmbH, Karlsruhe,  
262 Germany, Pfs25-related Western blots). Primary antibodies used for immunolabelling (Table  
263 **1**) were utilized in combination with appropriate secondary antibodies purchased from BioRad  
264 (München, Germany) and BCIP-NBT (VWR international, Radnor, USA) or HRP substrate  
265 (Thermo Fisher Scientific, Waltham, USA).

266 Coomassie staining of polyacrylamide (PAA) gels were also done as previously described [54].  
267 N-Glycosylation of the heterologous target proteins was analyzed by treatment with an  
268 endoglycosidase H (EndoH) prior to SDS-PAGE [44].

269 Host cell proteins (HCP) were quantified by anti-HCP enzyme-linked immunosorbent assay  
270 (ELISA) as described previously [44].

271 Analyses by ELISA were performed in Nunc MaxiSorp™ flat-bottom 96 well ELISA plate  
272 (Thermo Fisher Scientific, Waltham). For specific detection of *P. falciparum* antigen Pfs25, the

273 wells were coated over-night at 4 °C with 1 µg mL<sup>-1</sup> (50 µL per well) of the respective VLP in  
274 PBS and blocked with 1 % (w/v) BSA in PBS for 1 - 2 h at RT before polyclonal mouse anti-  
275 Pfs25 antibodies were applied as primary immunoreagents for 2 h. The plate was washed  
276 thrice using PBST in between antibody incubation steps. Secondary polyclonal goat anti-  
277 mouse IgG HRP-conjugated antibody was used to detect antibody binding. Color detection  
278 was developed using ABTS liquid substrate (Sigma-Aldrich) which was subsequently stopped  
279 with 1 % SDS. The level of antibody binding was measured as optical density in a GENios  
280 Microplate Reader (Tecan, Männedorf, Switzerland) at 405 nm.

281 For specific detection of *P. falciparum* antigen Pfs230, plates were coated with indicated  
282 concentrations of VLP (4°C, over-night) and subsequently blocked with 1% casein in PBS  
283 (Sigma-Aldrich) for 2h at 37°C before primary antibodies were added (polyclonal mouse anti-  
284 Pfs230 or monoclonal 1B3 antibody, 10 µg mL<sup>-1</sup>). Secondary HRP-conjugated antibodies  
285 (polyclonal goat anti-mouse IgG at 1/1000 from Millipore) were used to detect antibody binding.  
286 Color detection was developed using ABTS liquid substrate (Sigma-Aldrich), which was  
287 subsequently stopped using 1 % SDS. PBS was used as a negative control and plates were  
288 washed thrice using PBS with 0.05 % Tween in between antibody incubation steps. The level  
289 of antibody binding was measured as absorption at 405nm ( $A_{405nm}$ ).

290 Analysis of VLP were performed as essentially described previously described [44] by dynamic  
291 light scattering (DLS), super-resolution microscopy (N-SIM; structured illumination microscopy)  
292 and transmission electron microscopy (TEM). As primary anti-Pfs230 antibodies, polyclonal  
293 mouse antibodies were applied that were described to have transmission-blocking activity [55].  
294 Cross-reactivity with plain dS VLP without a fusion protein was checked carefully.

295

296

297

298

299

300

301

302

303 **Table 1 List of immunoreagents used for specific detection of the target proteins**

| Antigen | Primary antibody                | Source                                                       | Reference |
|---------|---------------------------------|--------------------------------------------------------------|-----------|
| dS      | 7C12 <sup>(a)</sup>             | BioGenes GmbH (Berlin, Germany)                              | [56,57]   |
| Pfs25   | 32F81 <sup>(b)</sup>            | National Institutes of Health (NIH, Bethesda, Maryland, USA) | [9,58]    |
|         | 4B7 <sup>(b)</sup>              | National Institutes of Health (NIH, Bethesda, Maryland, USA) | [23,59]   |
| Pfs230  | mouse polyclonal <sup>(c)</sup> | National Institutes of Health (NIH, Bethesda, Maryland, USA) | [55]      |
|         | 1B3                             | National Institutes of Health (NIH, Bethesda, Maryland, USA) | [10]      |

304 (a) detects the wild-type dS and the dS domain of each fusion protein

305 (b) Monoclonal antibodies 32F81 and 4B7 were kindly provided by PATH Malaria Vaccine Initiative and BEI  
306 Resources NIAID, NIH.

307 (c) Polyclonal mouse antibody was kindly provided by Carole Long and Kazutoyo Miura, NIH.

308

309

310

## 311 4. Results

### 312 4.1. Design of fusion proteins

313 In this study, three different types of chimeric VLP each displaying a different foreign antigen  
314 derived from *P. falciparum* were developed. The incorporation of *P. falciparum* transmission  
315 stage antigens into the dS-based VLP scaffold was realized by the design of fusion proteins  
316 each containing one of the malaria antigens *N*-terminally fused to the dS. The formation of VLP  
317 was allowed by interaction of dS subunits or dS domains of fusion proteins. Literature was  
318 screened for promising targets and the following antigens were chosen to be displayed on the  
319 surface of the membranous VLP. Additional details on the fusion protein construction are given  
320 in Table 2.

321 The fusion protein Pfs25-dS comprised amino acids (aa) 23-193 of the cysteine-rich  
322 zygote/ookinete surface protein Pfs25 of *P. falciparum* fused to the dS. The Pfs25 part  
323 contained the four EGF-like domains of the naive antigen but missed the *N*-terminal signal

324 sequence and the hydrophobic C-terminus [24,25,55]. Pfs230c-dS was constructed by fusing  
325 a 630 aa fragment (Pfs230c, [22]) of the *P. falciparum* transmission stage antigen Pfs230 to  
326 the dS. Due to its size, this fragment was challenging for a chimeric VLP-based approach.  
327 Thus, a shorter variant thereof (Pfs230D1M, aa 542-736 according to MacDonald et al. [38])  
328 was introduced in the third fusion protein construct, Pfs230D1M-dS; this construct has been  
329 effectively expressed as a monomeric protein in *Pichia pastoris* and is a TBV candidate in  
330 clinical development [38]. All fusion protein encoding genes were inserted into a pFPMT121-  
331 based plasmid [46] which carried the *LEU2* gene for selection of transformed yeast strains.  
332  
333

334 **Table 2 Summary of fusion proteins constructed and recombinantly produced in *H. polymorpha***

| Fusion protein | Number of aa <sup>(a)</sup> | MW [kDa] | Genbank reference of CDS | <i>P. falciparum</i> donor protein (Genbank reference) | Donor protein domain fused to dS | aa linker between <i>P. falciparum</i> antigen and dS |
|----------------|-----------------------------|----------|--------------------------|--------------------------------------------------------|----------------------------------|-------------------------------------------------------|
| Pfs25-dS       | 341                         | 37.0     | MH142260                 | zygote/ookinete surface protein Pfs25 (XP_001347587.1) | aa 23-193 [25]                   | GAGA                                                  |
| Pfs230c-dS     | 861                         | 98.0     | MH142261                 | gametocyte surface protein Pfs230 (XP_001349600.1)     | aa 443-1132 [22]                 | GAGA                                                  |
| Pfs230D1M-dS   | 366                         | 40.3     | MH142262                 | gametocyte surface protein Pfs230 (XP_001349600.1)     | aa 542-736 <sup>(b)</sup> [38]   | GAGA                                                  |

335 <sup>(a)</sup> Including an artificial start-methionine and aa 2-167 of the dS at the C-terminus

336 <sup>(b)</sup> Including N585Q aa exchange, elimination of a potential *N*-glycosylation site

337

## 338 4.2. Isolation of recombinant *H. polymorpha* production 339 strains

340 Typically, co-production of dS and a fusion protein composed of a foreign antigen fused to dS  
341 allows formation of chimeric “antigen-dS/dS” VLP [41,42]. For the generation of the three  
342 different types of VLP each displaying one of the *P. falciparum*-derived antigens, three  
343 recombinant *H. polymorpha* cell lines needed to be isolated that co-produce the scaffold  
344 protein dS and Pfs25-dS, Pfs230c-dS or Pfs230D1M-dS. To generate such strains, the dS-  
345 producing cell line A#299 [44] was super-transformed with an expression plasmid encoding  
346 the respective fusion protein. From each of the transformations, one strain co-producing the  
347 dS and the respective fusion protein was selected from the resulting transformants and used  
348 for production of chimeric VLP containing dS in combination with Pfs25-dS, Pfs230c-dS or  
349 Pfs230D1M-dS. The recombinant *H. polymorpha* strains that were used for production of VLP  
350 are indicated in Table 3.

351

352 **Table 3 Recombinant *H. polymorpha* production strains used for the generation of**  
353 **VLP.**

| Yeast strain designation | Transformed host strain | Produced recombinant protein(s) | Relevant genotype       |
|--------------------------|-------------------------|---------------------------------|-------------------------|
| RK#097                   | A#299 <sup>(a)</sup>    | dS and Pfs25-dS                 | <i>URA3, LEU2, ade1</i> |
| RK#114                   | A#299 <sup>(a)</sup>    | dS and Pfs230c-dS               | <i>URA3, LEU2, ade1</i> |
| Ko#119                   | A#299 <sup>(a)</sup>    | dS and Pfs230D1M-dS             | <i>URA3, LEU2, ade1</i> |

354 <sup>(a)</sup> Recombinant dS-producing *H. polymorpha* strain previously described [44]

355

356

357

358

359

360

361

362

363

364

### 365 **4.3. Production of chimeric Pfs25-dS/dS VLP**

366 Chimeric Pfs25-dS/dS VLP composed of wild-type dS and the fusion protein Pfs25-dS were  
367 isolated from cell paste of strain RK#097. A total of  $97.6 \pm 10.3$  mg chimeric VLP could be  
368 isolated from  $97 \pm 3$  g DCW that were processed ( $1.0 \pm 0.1$  mg  $g^{-1}$ ). In denaturing assays (SDS-  
369 PAGE, Western blot, Fig 1 A), the final sample was compared to plain dS VLP containing the  
370 dS without fusion protein [44] and thus lacks the fusion protein-specific signals. Apart from  
371 that, similar protein signal patterns were observed for the chimeric Pfs25-dS/dS VLP  
372 preparation in comparison to the plain dS VLP. Analysis of the Coomassie stained PAA gel by  
373 densitometry (lane 2) indicated 90 % Pfs25-dS/dS purity on the protein level and about 3 %  
374 fusion protein content. Anti-dS and anti-Pfs25 Western blots (lanes 4 and 6) were used to  
375 identify the VLP forming proteins. The apparent MW of Pfs25-dS (~33 kDa) and dS (~15 kDa)  
376 were slightly below their theoretical MW of 37 kDa or 18.2 kDa, respectively. For both VLP  
377 preparations additional signals were detected in the anti-dS Western blot that likely correspond  
378 to either oligomeric forms (dimers, trimers, etc.) of the dS or authentic forms of higher mobility  
379 (dS-HMF, [44]). The Pfs25-dS was reactive with transmission-blocking mAb 32F81 but non-  
380 specific cross reactivity with the dS was observed (lanes 5 and 6) applying Roti®-Block (Carl  
381 Roth GmbH) as blocking reagent. Cross reactivity was not observed if 3 % powdered milk in  
382 PBS containing 0.05 % Tween 20 was applied as blocking reagent (Fig S 1 in the  
383 supplementary material).

384  
385 ELISA was used to detect expression of Pfs25 on the surface of native VLP. Reactivity of the  
386 Pfs25-dS/dS VLP preparation was demonstrated with two Pfs25-specific antibodies 32F81 [9]  
387 and 4B7 [23] having transmission-blocking activity (Fig 1 C). Just as in the anti-Pfs25 Western  
388 blot, cross reactivity to the dS was observed. However, the Pfs25-dS/dS VLP were  
389 substantially more reactive.

390  
391 Analysis by negative staining TEM and DLS (Fig 1 B and D) confirmed the formation of  
392 homogeneous particles. TEM imaging indicated particles of predominantly 20-40 nm according



393 to manual evaluation. DLS showed a monomodal size distribution and a monodisperse particle  
394 population characterized by a hydrodynamic diameter of 64 nm (PDI 0.11). A summary of the  
395 production process and the composition of the final Pfs25-dS/dS VLP preparation can be found  
396 in Table 4.

397

398 *N*-glycosylation of the Pfs25-dS fusion protein was analyzed in crude cell lysates by treatment  
399 with EndoH (Fig 2). The Pfs25-dS fusion protein construct “M” was described in Table 2 and  
400 was chosen for chimeric VLP production because its recombinant expression in *H. polymorpha*  
401 resulted in a homogeneous product (Fig 2, lanes 1 and 7). Despite its three potential *N*-  
402 glycosylation sites within the Pfs25 aa sequence, the “M” construct was not sensitive to EndoH  
403 treatment. The fusion protein was detected at ~33 kDa MW without and after EndoH treatment  
404 indicating it was not *N*-glycosylated. However, in the initial experiments two additional Pfs25-  
405 dS constructs were included (“CL” and “QQ”, Fig 2). The “CL” construct analyzed in lanes 3/4  
406 and 9/10 contained the leader sequence of the chicken lysozyme at its *N*-terminus instead of  
407 the artificial start-methionine of the “M” construct. The third construct (“QQ”) analyzed in lanes  
408 5/6 and 11/12 was like the “CL” construct but contained two single amino acid exchanges  
409 (N112Q, N187Q) eliminating two of the three potential *N*-glycosylation sites. The design of the  
410 Pfs25-dS fusion protein affected its degree of *N*-glycosylation. The expression of “QQ”  
411 construct led to two Pfs25-dS species detected at ~33 or ~35 kDa MW (lanes 5 and 11).  
412 Expression of the “CL” variant resulted in the detection of four fusion protein species  
413 characterized by molecular weights of ~33 kDa (faint band), ~35 kDa, ~38 kDa and ~42 kDa  
414 (faint band, lanes 3 and 9). In both cases the signals unified in the ~33 kDa signal after  
415 deglycosylation by treatment with EndoH (lanes 4, 6, 10 and 12). Thus the ~33 kDa signal  
416 refers to the non-glycosylated form of the Pfs25-dS fusion protein.

417

418

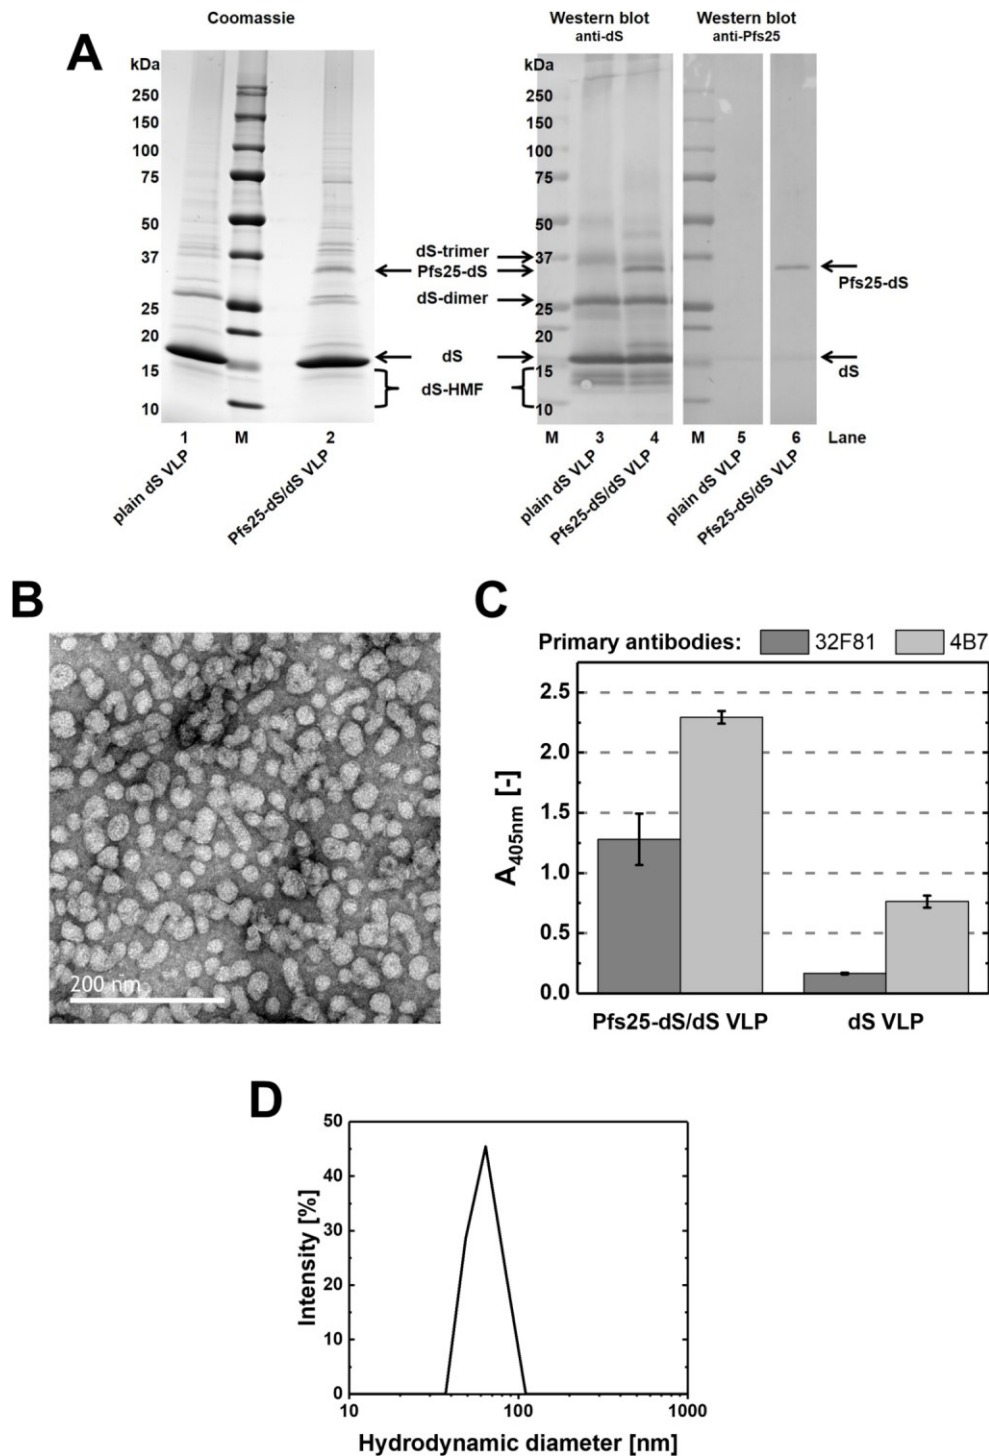

419

420 **Figure 1 Analyses of purified Pfs25-dS/dS VLP derived from strain RK#097.** (A): Reducing  
 421 SDS-PAGE (left, 10  $\mu$ g protein loaded) and Western blot (right, 1  $\mu$ g protein loaded) comparing  
 422 Pfs25-dS/dS VLP to plain dS VLP which were purified from strain A#299 and do not contain  
 423 any fusion protein. Lanes 1 and 2: Coomassie stained PAA gel. Lanes 3 and 4: Western blot  
 424 probed with anti-dS 7C12 mAb. Lanes 5 and 6: Western blot probed with anti-Pfs25 mAb  
 425 32F81 and analyzed on the same membrane. M: molecular weight marker. (B): TEM imaging.

426 (C): Analysis by ELISA in comparison to plain dS VLP purified from strain A#299. The wells of  
427 the ELISA plate were coated with  $1 \mu\text{g mL}^{-1}$  ( $50 \mu\text{L}$  per well) chimeric Pfs25-dS/dS VLP or  
428 same amounts of plain dS VLP. Error bars indicate standard deviation based on triplicates.

429 (D): Size distribution determined by DLS.

430

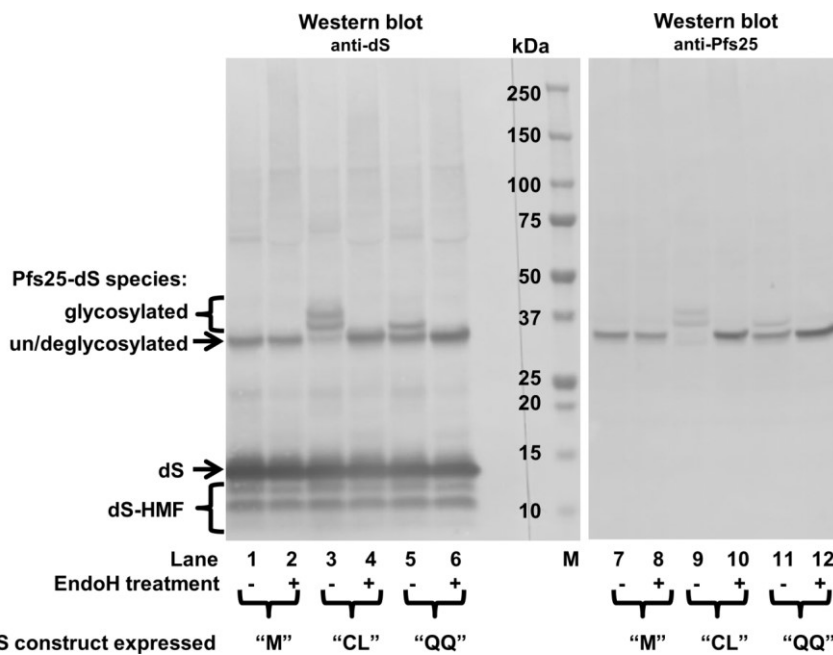

431

432 **Figure 2 Western blot analysis of different Pfs25-dS constructs in crude cell lysates**

433 **before and after treatment with EndoH.** Crude cell lysates of three different recombinant

434 *H. polymorpha* strains were analyzed by anti-dS (mAb 7C12) and anti-Pfs25 (mAb 32F81)

435 Western blots. The strains co-expressed the wildtype dS and one of the three Pfs25-dS fusion

436 protein constructs: "M" (*N*-terminal artificial start-methionine), "CL" (*N*-terminal chicken

437 lysozyme signal sequence) or "QQ" (*N*-terminal chicken lysozyme signal sequence and

438 N112Q, N187Q aa exchanges). Samples were treated with EndoH where indicated. M:

439 molecular weight marker.

440

441

442

443

444

445

446

#### 447 **4.4. Production of chimeric Pfs230c-dS/dS VLP**

448 From 73.4±8 g DCW of strain RK#114, 14.5±2.6 mg chimeric Pfs230c-dS/dS VLP composed  
449 of wild-type dS and the fusion protein Pfs230c-dS were isolated ( $Y_{P/X} = 0.2 \pm 0.06 \text{ mg g}^{-1}$ ). At  
450 different stages during processing of Pfs230c-dS/dS VLP substantial losses of product were  
451 observed due to precipitation. Therefore, the purification protocol was adjusted compared to  
452 the purification of Pfs25-dS/dS VLP: the PEG and NaCl concentrations were reduced for  
453 clarification of the crude cell lysate, the Capto Core 700 matrix was used instead of the  
454 Mustang Q membrane adsorber and the dialysis procedure was modified. To reach higher  
455 product purity with the modified process, an additional wash step during the Aerosil batch  
456 procedure and a second Capto Core 700 run were added to the purification process.

457

458 Purified Pfs230c-dS/dS VLP were analyzed in native and non-native assays (Fig 3). VLP  
459 forming proteins were identified by anti-dS Western blot (Fig 3 A, lane 1) or by Pfs230-specific  
460 Western blot (lane 2), respectively. No cross-reactivity of the anti-Pfs230 polyclonal antibodies  
461 with the dS was observed. The purity on protein level (64 %) was investigated by densitometry  
462 for lane 3 of the Coomassie stained PAA gel (Fig 3 A). All bands detected between the fusion  
463 protein and the dS were considered as impurities. A subset of these bands was reactive in an  
464 anti HCP Western blot (Fig S 5 in the supplementary material). The most prominent host cell  
465 protein band beside the two product proteins (dS and Pfs230c-dS) was detected at 32 kDa  
466 apparent MW and represented 12 % of the total band volume of Coomassie stained lane 3.  
467 The Pfs230c-dS specific signal appears diffuse in lanes 3 and 4 (Fig 3 A). Upon treatment with  
468 EndoH, the diffuse smear disappeared and the main band became intensified by factor 2.6  
469 according to analysis by densitometry. This revealed that the six potential *N*-glycosylation sites  
470 within the aa sequence of the Pfs230c antigen were in a subpopulation of the molecules at  
471 least partially occupied. Signal intensities of wild-type dS and deglycosylated Pfs230c-dS

472 obtained by densitometry from lanes 5 to 8 were used to calculate the ratio of the two target  
473 proteins. For that purpose, the intensities were plotted against the protein amount loaded in  
474 the corresponding lane. The slopes obtained from linear regression revealed a ratio of wild-  
475 type dS to Pfs230c-dS in the chimeric Pfs230c-dS/dS VLP of approximately 70 % wild-type dS  
476 to 30 % fusion protein.

477  
478 Formation of VLP was confirmed for both samples by TEM and DLS (Fig 3 B and D). DLS  
479 indicated a monomodal and monodisperse (PDI 0.09) particle population characterized by  
480 hydrodynamic diameter of 91 nm. However, the appearance of the Pfs230c-dS/dS VLP in TEM  
481 imaging was rather heterogeneous (Fig 3 B). The dominating species of detected objects were  
482 in the range of 44-60 nm diameter but also larger structures (>120 nm) were observed  
483 frequently and this could be due to particle aggregation.

484  
485 Analysis by N-SIM was applied as native immunoassay using polyclonal antibodies described  
486 to have transmission-blocking activity [55]. This demonstrated co-localization of dS and  
487 Pfs230c antigens in nano-scaled particles (circled spots, Fig 3 C) providing supporting  
488 evidence of the formation of chimeric VLP by wild-type dS and Pfs230c-dS. Also, Pfs230c-  
489 dS/dS VLP were reactive with anti-Pfs230 polyclonal mouse antibodies [55] in ELISA (Fig 4  
490 and Fig S 4) but failed to react with monoclonal anti-Pfs230 antibody 1B3 [10] (Fig S 4 in the  
491 supplementary material). Cross reactivity of the anti-Pfs230 polyclonal antibody with the dS  
492 VLP scaffold in form of plain dS VLP [44] was not observed in this native assay (Fig 4).

493

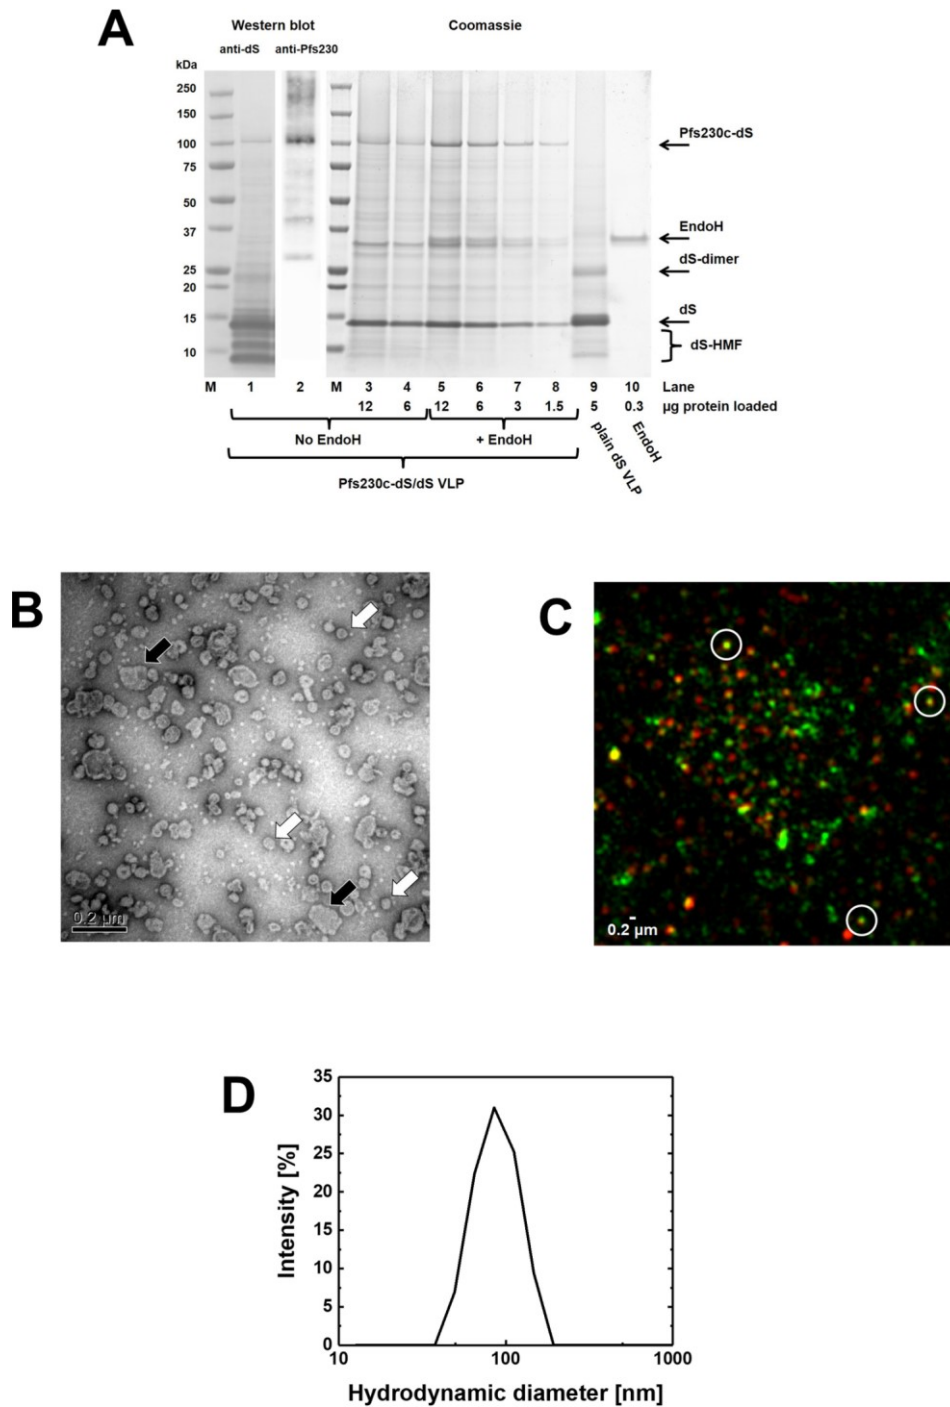

494

495 **Figure 3 Analyses of purified Pfs230c-dS/dS VLP derived from strain RK#114. (A):**

496 Western blot probed with anti-dS 7C12 mAb (lane 1) or probed with polyclonal anti-Pfs230

497 antibody (lane 2) and Coomassie stained PAA gel (lanes 3-10). Samples loaded in lanes 5-8

498 were treated with an EndoH. Lane 9: purified plain dS VLP. Lane 10: EndoH used. M:

499 molecular weight marker. (B): TEM imaging at 100,000-fold magnification. (C): N-SIM analysis

500 of purified VLP containing Pfs230c antigen showing immunolabeling of dS (green) or Pfs230c

501 (red). Three nano-scaled spots that showed co-localization of the fluorescence markers  
502 (yellow) were representatively circled. (D): Size distribution determined by DLS.  
503

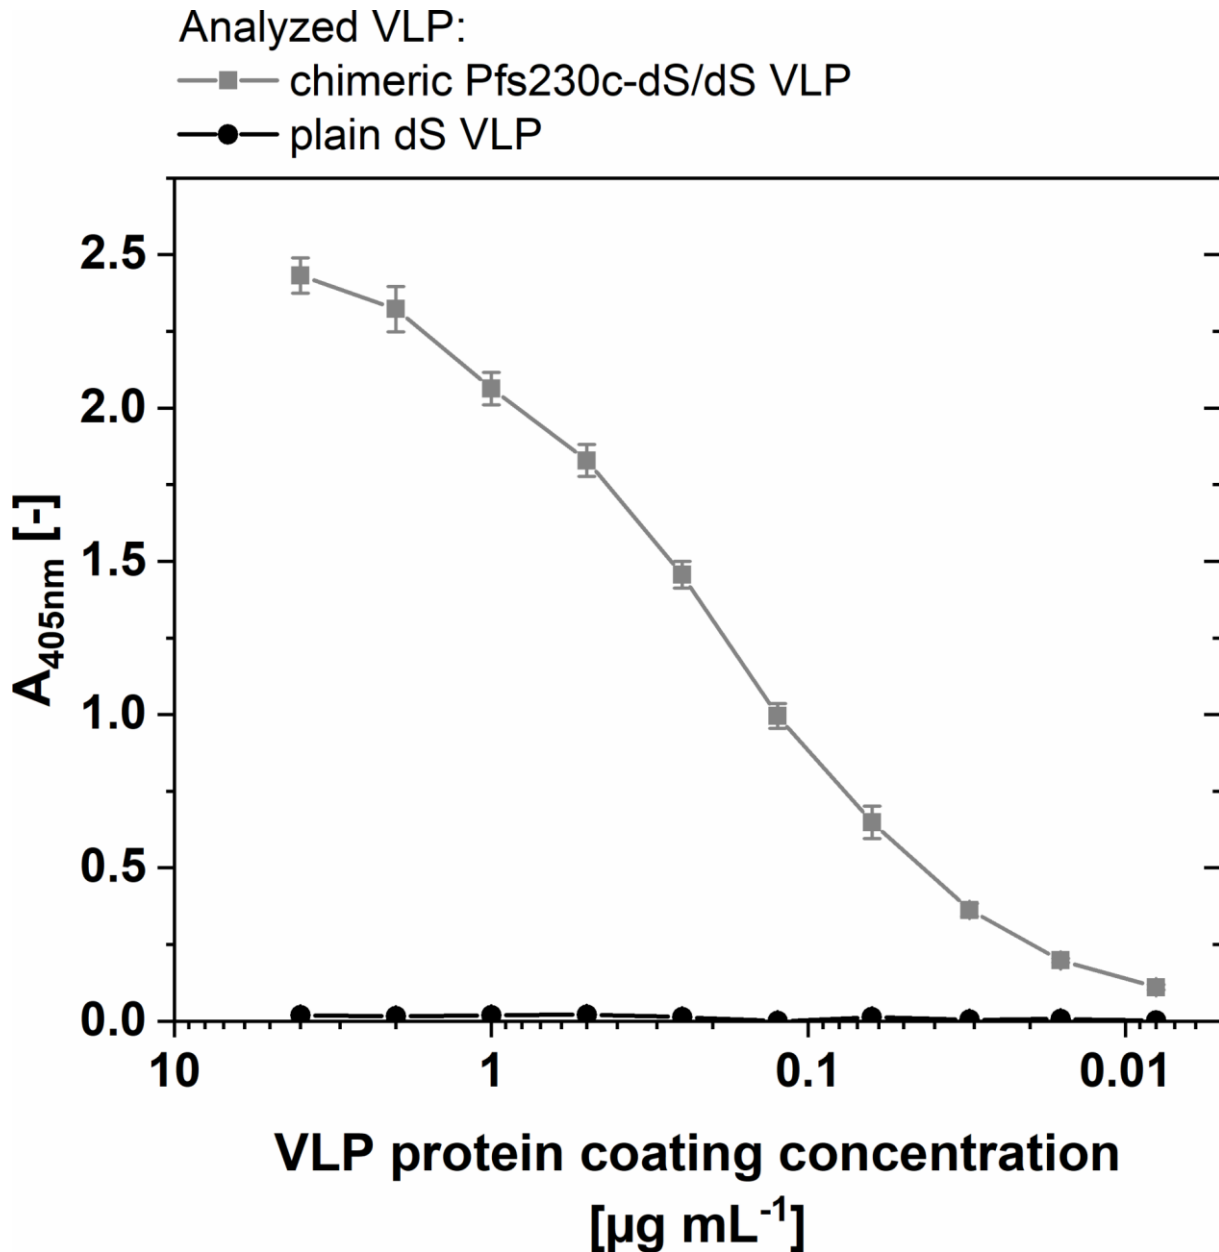

504  
505 **Figure 4 ELISA data on purified Pfs230c-dS/dS VLP derived from strain RK#114.** The  
506 ELISA plate wells were coated with the indicated chimeric Pfs230c-dS/dS VLP or plain dS  
507 VLP. The mouse polyclonal antibody was applied at  $10 \mu\text{g mL}^{-1}$ .  
508  
509



## 510 **4.5. Production of chimeric Pfs230D1M-dS VLP**

511 Processing 8.1±0.9 g DCW of strain Ko#119 yielded 5.1±0.4 mg of chimeric  
512 Pfs230D1M-dS/dS VLP ( $Y_{P/X} = 0.64 \pm 0.1 \text{ mg g}^{-1}$ ) that were composed of wild-type dS and the  
513 fusion protein Pfs230D1M-dS. Processing of Pfs230D1M-dS/dS VLP was easier than  
514 processing of Pfs230c-dS/dS VLP. No unexpected product losses during downstream  
515 processing (DSP) were observed and thus a less complex DSP could be chosen. The specific  
516 yield  $Y_{P/X}$  of Pfs230D1M-dS/dS VLP was about three times as much as for the Pfs230c-dS/dS  
517 VLP.

518

519 Both VLP-forming proteins were detected by anti-dS Western blot (Fig 5 A, lane 2). The fusion  
520 protein Pfs230D1M-dS was specifically detected by anti-Pfs230 Western blot (lane 3). Judging  
521 by their MW, the additional high MW signals in this lane likely correspond to oligomeric forms  
522 (dimers, trimers, etc.) of the fusion protein. Most likely, these forms were not detected by the  
523 anti-dS mAb in lane 2 because the signals were below the detection limit. Analysis of a  
524 Coomassie stained PAA gel (Fig 5 A, lane 1) by densitometry indicated 72 % purity on protein  
525 level and a composition of 24 % fusion protein and 76 % wild-type dS. Formation of VLP was  
526 confirmed by TEM (Fig 5 B) and indicated 42 – 62 nm diameter for the VLP. Size distribution  
527 analyzed by DLS (Fig 5 D) indicated monomodal size distribution and a monodisperse particle  
528 population characterized by a hydrodynamic diameter of 84 nm (PDI 0.09). N-SIM was  
529 performed as for Pfs230c-dS/dS VLP with a similar result (Fig 5 C). The Pfs230D1M-specific  
530 and the dS-specific signals co-localized in nano-scaled particles (circled spots).



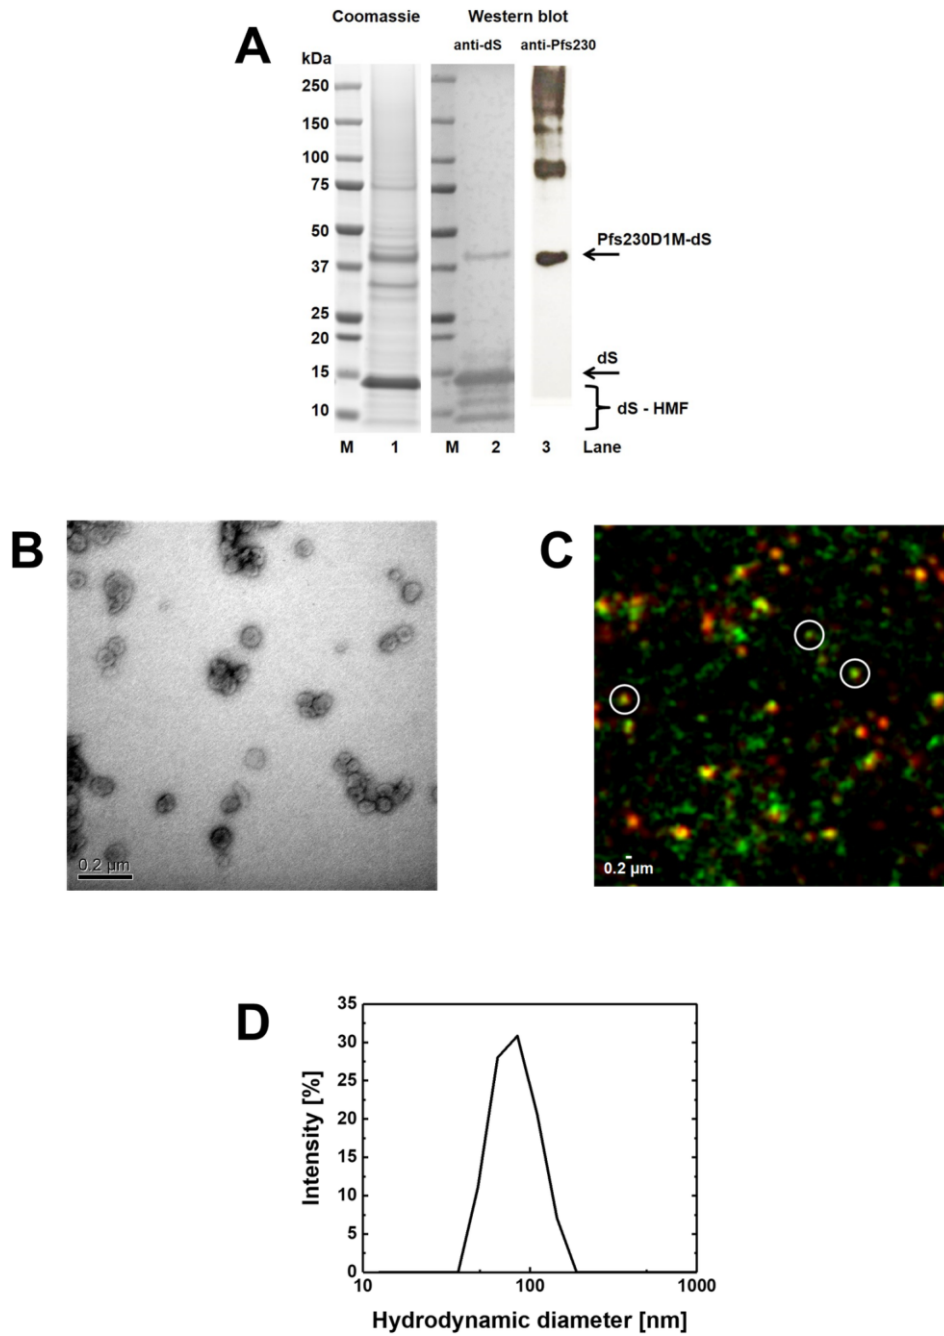

531

532 **Figure 5 Analyses of purified Pfs230D1M-dS/dS VLP derived from strain Ko#119. (A):**

533 Coomassie stained PAA gel (lane 1, 12  $\mu$ g protein loaded), Western blot probed with anti-dS

534 7C12 mAb (lane 2) or probed with polyclonal anti-Pfs230 antibody (lane 3). M: molecular

535 weight marker. (B): TEM imaging at 100,000-fold magnification. (C): N-SIM analysis of purified

536 VLP containing Pfs230D1M antigen showing immunolabeling of dS (green) or Pfs230D1M

537 (red). Three nano-scaled spots that showed co-localization of the fluorescence markers

538 (yellow) were representatively circled. (D): Size distribution determined by DLS.

539

540

## 541 **4.6. Summary and comparison**

542 The production processes and the compositions of the three different VLP preparations are  
543 summarized in Table 4. The purification of chimeric Pfs25-dS/dS VLP from strain RK#097 was  
544 the most productive process and yielded  $1.0 \pm 0.1$  mg VLP per g DCW or  $39 \pm 5$  mg VLP per L  
545 cell culture with 90 % purity on protein level. However, the fusion protein content in the VLP  
546 was lowest ( $\sim 3$  %) in comparison to the other VLP preparations.

547

548 Despite the size of the Pfs230c antigen and difficulties due to product precipitation, isolation  
549 of chimeric Pfs230c-dS/dS VLP was successful. However, the VLP yield was considerably  
550 lower ( $0.2 \pm 0.06$  mg g<sup>-1</sup> or  $8 \pm 2$  mg L<sup>-1</sup>) than for the chimeric Pfs25-dS/dS VLP but the fusion  
551 protein content of the VLP was approximately 10-times higher than for Pfs25. The purity of  
552 Pfs230c-dS/dS VLP on the protein level was substantially lower (64 % on protein level) and  
553 could not be improved in the course of this study.

554

555 VLP yield and purity, were improved by modification of the fusion protein. The truncated  
556 Pfs230D1M-dS version led to tripling in VLP yield ( $Y_{P/X}$ ) combined with improvement in purity  
557 on the protein level by 8 %. However, the yield per culture volume was lower due to cultivation  
558 in shake flasks compared to fermentation in 2.5 L scale. The Pfs230D1M-dS/dS and the  
559 Pfs230c-dS/dS VLP preparations had comparable fusion protein contents.

560

561 The hydrodynamic diameters determined by DLS were consistently slightly larger than the  
562 respective diameters specified by manual evaluation of the TEM images. Nevertheless, all data  
563 collected are within dimensions that could be expected for this kind of VLP [44,60]. The  
564 determined buoyant densities ( $1.13 - 1.16$  g cm<sup>-3</sup>) and lipid contents (30-40 %) were also  
565 consistent throughout the VLP preparations and plausible for lipoproteins or VLP [61].

566

567 **Table 4 Summary of production processes leading to the three VLP preparations containing Pfs25-dS,**  
 568 **Pfs230c-dS or Pfs230D1M-dS.**

|                                                                 | VLP forming proteins     |                          |                     |
|-----------------------------------------------------------------|--------------------------|--------------------------|---------------------|
|                                                                 | dS and Pfs25-dS          | dS and Pfs230c-dS        | dS and Pfs230D1M-dS |
| <i>H. polymorpha</i> strain                                     | RK#097                   | RK#114                   | Ko#119              |
| Cell mass generation                                            | Fermentation 2.5 L scale | Fermentation 2.5 L scale | Shake flask         |
| DCW used for VLP purification [g]                               | 97±3                     | 73.4±8                   | 8.1±0.9             |
| VLP purity on protein level <sup>(a)</sup> [%]                  | 90                       | 64                       | 72                  |
| Isolated VLP [mg]                                               | 97.6±10.3                | 14.5±2.6                 | 5.1±0.4             |
| VLP yield per biomass, $Y_{P/X}$ [mg g <sup>-1</sup> ]          | 1.0±0.1                  | 0.2±0.06                 | 0.64±0.1            |
| Product yield per culture volume [mg L <sup>-1</sup> ]          | 39±5                     | 8±2                      | 3.2±0.3             |
| Fusion protein per total VLP-forming protein <sup>(a)</sup> [%] | ~3                       | ~30                      | ~24                 |
| VLP diameter by TEM [nm]                                        | 20 - 40                  | 44 - 60                  | 42 - 62             |
| Hydrodynamic VLP diameter by DLS [nm]                           | 64 (PDI: 0.11)           | 91 (PDI: 0.09)           | 84 (PDI: 0.09)      |
| Buoyant density [g cm <sup>-3</sup> ]                           | 1.14                     | 1.13 - 1.16              | 1.14 - 1.15         |
| Lipid content of purified VLP [%]                               | 30±4                     | NE                       | 38±4                |

<sup>(a)</sup> Based on analysis of Coomassie-stained PAA gels by densitometry.

NE.: not evaluated

569  
570  
571

572

573

## 574 **5. Discussion**

575 This work introduces a novel VLP platform for the display of malaria transmission-blocking  
 576 antigens derived from *P. falciparum* on the surface of a nano-scaled VLP scaffold. Chimeric  
 577 VLP containing the leading malaria vaccine candidates Pfs25 and Pfs230 were engineered,  
 578 purified and characterized.

579

580 A DSP approved for hepatitis B vaccine production from yeast [51] was used for isolation of  
 581 highly pure chimeric Pfs25-dS/dS VLP. Initially, three different Pfs25-dS fusion protein  
 582 constructs were constructed and it was shown that depending on the design of the construct,  
 583 the degree of *N*-glycosylation varied (Fig 2). Due to product homogeneity and therewith  
 584 potential regulatory advantages, the non-glycosylated variant was chosen for chimeric Pfs25-  
 585 dS/dS VLP production. The purified Pfs25 containing VLP were reactive with transmission-  
 586 blocking monoclonal antibodies 32F81 and 4B7 in ELISA [58,59] and could be identified as  
 587 particulate structures in TEM imaging (Fig 1). These can be considered as promising findings  
 588 for upcoming immunization studies. However, cross reactivity of the dS with the antibodies

589 32D81 and 4B7 was observed in Western blot (Fig 1A) and ELISA (Fig 1C) which complicates  
590 interpretation of the results. In case of the antibody 4B7, the difference in reactivity with the  
591 chimeric Pfs25-dS/dS VLP or with plain dS VLP not containing the Pfs25 antigen was only  
592 about factor 3. This difference in reactivity could be expected to be greater and may be caused  
593 by misfolded Pfs25 antigen e.g. due to incomplete formation of disulfide bonds or because of  
594 the low Pfs25 fusion protein content in the isolated chimeric VLP. Depletion of Pfs25-dS  
595 relative to dS in the course of the DSP was not observed and thus this low inclusion rate could  
596 have two possible reasons.

597 (1) The ratio of Pfs25-dS to wild-type dS produced by RK#097 was too low to facilitate  
598 isolation of chimeric VLP with higher fusion protein content.

599 (2) The chosen fusion protein construct Pfs25-dS is suboptimal for high fusion protein  
600 content in this kind of VLP.

601 To overcome possibility 1, recombinant *H. polymorpha* strains producing improved fusion  
602 protein to dS ratios were generated by applying alternative strain generation approaches  
603 described in [44]. Solubility of the VLP forming proteins in homogenates of these new strains  
604 was however reduced compared to strain RK#097 (Figs S 2 and S 3 in the supplementary  
605 material). As a next step, solubilization of the VLP proteins would need to be optimized and  
606 purified chimeric VLP should then be compared head-to-head with purified particles from strain  
607 RK#097. To address possibility 2, the fusion protein construct may be modified e.g. by  
608 truncation of the Pfs25 antigen. The EGF2-domain of the protein was described to retain the  
609 transmission-blocking activity [62] and might be used instead of the more complex, full-length  
610 Pfs25.

611

612 For production of VLP expressing a Pfs230 construct, the 630 aa Pfs230c fragment [22] of the  
613 *Plasmodium* antigen Pfs230 was fused to the dS and chimeric Pfs230c-dS/dS VLP were  
614 purified. The incorporation of the 80 kDa Pfs230c fragment into chimeric VLP demonstrated  
615 that the integration of foreign antigens in dS-based VLP is not necessarily limited by their size;  
616 this is a substantial advantage over other VLP platforms [13]. The observed precipitation of the

617 Pfs230c-dS containing material during DSP may be due to misfolded protein. This may also  
618 be an explanation for missing response in ELISA applying the 1B3 monoclonal antibody  
619 (Fig S 4 in the supplementary material). The Pfs230c-dS aa sequence contains 16 cysteine  
620 residues which could be linked incorrect via disulfide bonds. In our experiments,  
621 overexpression of a recombinant protein disulfide isomerase did not result in detectable  
622 reduction of product loss during DSP which does not support the hypothesis of incorrectly  
623 formed disulfide bonds. Additionally, our observations regarding the solubility of the Pfs230c  
624 construct correlate with reports on improving the solubility of Pfs230 fragments by choosing  
625 particular fusion partners [22,63]. Although this issue did not hinder the isolation of chimeric  
626 VLP, it resulted in changes in the DSP and led to reduced VLP yields. Nonetheless, the  
627 obtained yields and fusion protein contents of the VLP (~30 %) are good in the context of  
628 chimeric VLP vaccines [64] and the reactivity with the polyclonal anti-Pfs230 antibody in native  
629 ELISA (Fig 4) is a promising result.

630

631 A remaining challenge regarding the chimeric Pfs230c-dS/dS VLP purification is the relatively  
632 low purity of 64 % of the final preparation. It can be speculated that a contributor to the sub-  
633 optimal purity is that the residual HCP impurities were tightly associated with the particles or  
634 the Pfs230c antigen. Separation of product from contaminative proteins was not possible in  
635 the course of this study. A revised purification protocol may need to be developed addressing  
636 reduction of the most prominent, persisting protein contaminants already present in earlier  
637 purification steps.

638

639 Compared to the Pfs230c-dS/dS VLP, the Pfs230D1M [38] variant was easier to process; no  
640 loss of product due to precipitation was observed and higher VLP yield per biomass was  
641 achieved with comparable fusion protein content. This finding of improved solubility agrees  
642 with successful heterologous production of soluble Pfs230D1M fragment in *P. pastoris* and  
643 secretion of the product into the culture supernatant [38].

644

645 For the two chimeric VLP preparations containing Pfs230 fragments, the co-localization of dS  
646 and Pfs230 in nano-scaled particles was observed by N-SIM analysis. However, the resolution  
647 of the test set-up may not be sufficient for the detection of single chimeric VLP. Due to  
648 physicochemical homogeneity of the analyzed samples, it can be concluded that co-  
649 localization of both proteins in clusters of few VLP support the occurrence of both proteins in  
650 single VLP. Together, N-SIM analysis (Figs 3 C and 5 C) and ELISA (Fig 4) proved the  
651 accessibility of both Pfs230 constructs under native conditions for immunolabeling which  
652 substantiates the display of the respective malaria antigens on the VLP surface. Additionally,  
653 these native immunoassays demonstrated reactivity with antibodies that are known to have  
654 transmission-blocking activity. This is again promising regarding applying these VLP in vaccine  
655 immunogenicity studies.

656

657 The expression system *H. polymorpha* was shown to be a reliable and productive host for  
658 production of chimeric VLP displaying the difficult-to-express transmission-blocking antigens  
659 Pfs25 and Pfs230 on their surface. Yeasts combine the ease of genetic manipulation and the  
660 option for simple fermentation strategies of bacterial expression systems with the ability to  
661 modify proteins according to a general eukaryotic scheme [65]. Mammalian and insect cell  
662 expression systems might be the favorable systems in case of production and assembly of  
663 highly complex multi-layer VLP. However, the advantages of yeast-based VLP production is  
664 especially valued in the domain of simpler, single-layered VLP production [45,66–68].  
665 Particularly, the methylotrophic yeast *H. polymorpha* should be considered for production of  
666 chimeric VLP vaccine candidates since it is already established as a safe and reliable microbial  
667 cell factory for the production of biopharmaceuticals like hepatitis B VLP vaccines [51,69,70]  
668 or recombinant products that have been granted “generally recognized as safe” (GRAS) status.

669

670 The generation of recombinant *H. polymorpha* strains is more laborious than for other yeast  
671 species, including *Saccharomyces cerevisiae* [50]. However, these additional difficulties are  
672 compensated by a number of positive characteristics which are advantageous in

673 biotechnological applications (for review see e.g. [71–73]). These include mitotic stability of  
674 recombinant strains even under non-selective conditions due to stable integration of plasmids  
675 in high copy numbers into the host's genome [50], the availability of strong and regulated  
676 promoters derived from the methanol utilization pathway [74], the applicability of different  
677 carbon sources, especially glycerol [75,76] and the ease to grow *H. polymorpha* to high cell  
678 densities reaching dimensions of 100 g DCW per L culture broth [77]. Additional advantages  
679 of the methylotrophic yeast for the production of recombinant proteins are its relatively high  
680 optimal growth temperature of 37 °C which allows a better temperature management in large-  
681 scale fermentations and the tendency to reduced *N*-linked hyperglycosylation of recombinant  
682 proteins compared to *Saccharomyces cerevisiae* [74,78] combined with the lack of the  
683 terminal, hyperallergenic  $\alpha$ -1,3-linked mannose [79].

684

## 685 **6. Conclusion**

686 This study introduces a novel platform for the presentation of leading malaria transmission-  
687 blocking antigens of up to 80 kDa on the surface of chimeric VLP. Each of the generated  
688 chimeric VLP preparations was reactive under native conditions with antibodies described to  
689 have transmission-blocking activity. Regarding VLP yield, their purity and fusion protein  
690 content, the chimeric Pfs230D1M-dS/dS VLP appears to be the most promising candidate that  
691 emerged from this study. The obtained product yields in combination with the versatility and  
692 reliability of the described VLP production platform makes it a competitive system and should  
693 be considered for future malaria vaccine development. However, the potential of the three  
694 developed, chimeric VLP as effective vaccine candidates cannot be disclosed unless studies  
695 to assess their immunogenicity and transmission-blocking performance are completed. This  
696 represents together with improving the product purity especially for the chimeric Pfs230c-  
697 dS/dS VLP the future key tasks.

698



## 699 References

- 700 1. WHO. World Malaria Report 2017. World Health Organization. 2017.  
701 doi:10.1071/EC12504
- 702 2. Agnandji ST, Lell B, Fernandes JF, Abossolo BP, Methogo BGNO, Kabwende AL, et  
703 al. A phase 3 trial of RTS,S/AS01 malaria vaccine in African infants. *N Engl J Med.*  
704 2012;367: 2284–2295. doi:10.1056/NEJMoa1208394
- 705 3. Malaria Vaccine Funders Group. Malaria Vaccine Technology Roadmap. 2013; 1–9.
- 706 4. Halbroth BR, Draper SJ. Recent Developments in Malaria Vaccinology. *Adv Parasitol.*  
707 2015;88: 1–49. doi:10.1016/bs.apar.2015.03.001
- 708 5. Huang DB, Wu JJ, Tying SK. A review of licensed viral vaccines, some of their safety  
709 concerns, and the advances in the development of investigational viral vaccines. *J*  
710 *Infect.* 2004;49: 179–209. doi:10.1016/j.jinf.2004.05.018
- 711 6. Birkett AJ, Moorthy VS, Loucq C, Chitnis CE, Kaslow DC. Malaria vaccine R&D in the  
712 Decade of Vaccines: Breakthroughs, challenges and opportunities. *Vaccine.* 2013;31:  
713 B233–B243. doi:10.1016/j.vaccine.2013.02.040
- 714 7. Yoshida N, Nussenzweig RS, Potocnjak P, Nussenzweig V, Aikawa M. Hybridoma  
715 produces protective antibodies directed against the sporozoite stage of malaria  
716 parasite. *Science.* 1980;207: 71–73. doi:10.1126/science.6985745
- 717 8. Beeson JG, Drew DR, Boyle MJ, Feng G, Fowkes FJI, Richards JS. Merozoite surface  
718 proteins in red blood cell invasion, immunity and vaccines against malaria. *FEMS*  
719 *Microbiol Rev.* 2016;40: 343–372. doi:10.1093/femsre/fuw001
- 720 9. Vermeulen AN, Ponnudurai T, Beckers PJ, Verhave JP, Smits MA, Meuwissen JH.  
721 Sequential expression of antigens on sexual stages of *Plasmodium falciparum*  
722 accessible to transmission-blocking antibodies in the mosquito. *J Exp Med.* 1985;162:  
723 1460–1476. doi:10.1084/jem.162.5.1460
- 724 10. Quakyi IA, Carter R, Renner J, Kumar N, Good MF, Miller LH. The 230-kDa gamete  
725 surface protein of *Plasmodium falciparum* is also a target for transmission-blocking  
726 antibodies. *J Immunol.* 1987;139: 4213–4217.
- 727 11. Delves M, Angrisano F, Blagborough A. Antimalarial Transmission-Blocking  
728 Interventions: Past, Present, and Future. *Trends Parasitol.* 2018;1776: 1–12.  
729 doi:10.1016/j.pt.2018.07.001
- 730 12. Bobbala S, Hook S. Is There an Optimal Formulation and Delivery Strategy for Subunit  
731 Vaccines? *Pharm Res.* 2016;33: 2078–2097. doi:10.1007/s11095-016-1979-0
- 732 13. Fietze KM, Peabody DS, Chackerian B. Engineering virus-like particles as vaccine  
733 platforms. *Curr Opin Virol.* 2016;18: 44–49. doi:10.1016/j.coviro.2016.03.001
- 734 14. Grgacic EVL, Anderson DA. Virus-like particles: Passport to immune recognition.  
735 *Methods.* 2006;40: 60–65. doi:10.1016/j.ymeth.2006.07.018
- 736 15. McAleer WJ, Buynak EB, Maigetter RZ, Wampler DE, Miller WJ, Hilleman MR. Human  
737 hepatitis B vaccine from recombinant yeast. *Nature.* 1984;307: 178–180.  
738 doi:10.1038/307178a0
- 739 16. Tan M, Jiang X. Subviral particle as vaccine and vaccine platform. *Curr Opin Virol.*  
740 2014;6: 24–33. doi:10.1016/j.coviro.2014.02.009
- 741 17. “RTS/S Clinical Trials Partnership.” Efficacy and safety of RTS,S/AS01 malaria



- 742 vaccine with or without a booster dose in infants and children in Africa: Final results of  
743 a phase 3, individually randomised, controlled trial. *Lancet*. 2015;386: 31–45.  
744 doi:10.1016/S0140-6736(15)60721-8
- 745 18. Wu Y, Sinden RE, Churcher TS, Tsuboi T, Yusibov V. Development of Malaria  
746 Transmission-Blocking Vaccines: From Concept to Product. *Adv Parasitol*. 2015;  
747 doi:10.1016/bs.apar.2015.04.001
- 748 19. Renner J, Graves PM, Carter R, Williams JL, Burkot TR. Target antigens of  
749 transmission-blocking immunity on gametes of *Plasmodium falciparum*. *J Exp Med*.  
750 1983;158: 976–981. doi:10.1084/jem.20142182
- 751 20. Stone WJR, Dantzer KW, Nilsson SK, Drakeley CJ, Marti M, Bousema T, et al.  
752 Naturally acquired immunity to sexual stage P. *Falciparum* parasites. *Parasitology*.  
753 2016;143: 187–198. doi:10.1017/S0031182015001341
- 754 21. Kaslow DC, Quakyi IA, Syin C, Raum MG, Keister DB, Coligan JE, et al. A vaccine  
755 candidate from the sexual stage of human malaria that contains EGF-like domains.  
756 *Nature*. 1988;333: 74–76. doi:10.1038/333074a0
- 757 22. Williamson KC, Keister DB, Muratova O, Kaslow DC. Recombinant Pfs230, a  
758 *Plasmodium falciparum* gametocyte protein, induces antisera that reduce the  
759 infectivity of *Plasmodium falciparum* to mosquitoes. *Mol Biochem Parasitol*. 1995;75:  
760 33–42. doi:10.1016/0166-6851(95)02507-3
- 761 23. Barr PJ, Green KM, Gibson HL, Bathurst IC, Quakyi IA, Kaslow DC. Recombinant  
762 Pfs25 protein of *Plasmodium falciparum* elicits malaria transmission-blocking immunity  
763 in experimental animals. *J Exp Med*. 1991;174: 1203–1208.  
764 doi:10.1084/jem.174.5.1203
- 765 24. Kaslow DC, Shiloach J. Production, purification and immunogenicity of a malaria  
766 transmission-blocking vaccine candidate: TBV25H expressed in yeast and purified  
767 using nickel-NTA agarose. *Bio/Technology*. 1994;12: 494–499. doi:10.1038/nbt0594-  
768 494
- 769 25. Zou L, Miles AP, Wang J, Stowers AW. Expression of malaria transmission-blocking  
770 vaccine antigen Pfs25 in *Pichia pastoris* for use in human clinical trials. *Vaccine*.  
771 2003;21: 1650–1657. doi:10.1016/S0264-410X(02)00701-6
- 772 26. Coban C, Ishii KJ, Stowers AW, Keister DB, Klinman DM, Kumar N. Effect of CpG  
773 Oligodeoxynucleotides on the Immunogenicity of Pfs25, a *Plasmodium falciparum*  
774 Transmission-Blocking Vaccine Antigen. *Infect Immun*. 2004;72: 584–588.  
775 doi:10.1128/IAI.72.1.584-588.2004
- 776 27. Qian F, Wu Y, Muratova O, Zhou H, Dobrescu G, Duggan P, et al. Conjugating  
777 recombinant proteins to *Pseudomonas aeruginosa* ExoProtein A: A strategy for  
778 enhancing immunogenicity of malaria vaccine candidates. *Vaccine*. 2007;25: 3923–  
779 3933. doi:10.1016/j.vaccine.2007.02.073
- 780 28. Kubler-Kielb J, Majadly F, Wu Y, Narum DL, Guo C, Miller LH, et al. Long-lasting and  
781 transmission-blocking activity of antibodies to *Plasmodium falciparum* elicited in mice  
782 by protein conjugates of Pfs25. *Proc Natl Acad Sci U S A*. 2007;104: 293–298.  
783 doi:10.1073/pnas.0609885104
- 784 29. Wu Y, Przysiecki C, Flanagan E, Bello-Irizarry SN, Ionescu R, Muratova O, et al.  
785 Sustained high-titer antibody responses induced by conjugating a malarial vaccine  
786 candidate to outer-membrane protein complex. *Proc Natl Acad Sci U S A*. 2006;103:  
787 18243–18248. doi:10.1073/pnas.0608545103
- 788 30. Jones RM, Chichester JA, Mett V, Jaje J, Tottey S, Manceva S, et al. A plant-

- 789 produced Pfs25 VLP malaria vaccine candidate induces persistent transmission  
790 blocking antibodies against plasmodium falciparum in immunized mice. PLoS One.  
791 2013;8: e79538. doi:10.1371/journal.pone.0079538
- 792 31. Li Y, Leneghan DB, Miura K, Nikolaeva D, Brian IJ, Dicks MDJ, et al. Enhancing  
793 immunogenicity and transmission-blocking activity of malaria vaccines by fusing Pfs25  
794 to IMX313 multimerization technology. Sci Rep. 2016;6: 18848.  
795 doi:10.1038/srep18848
- 796 32. Brune KD, Leneghan DB, Brian IJ, Ishizuka AS, Bachmann MF, Draper SJ, et al. Plug-  
797 and-Display: decoration of Virus-Like Particles via isopeptide bonds for modular  
798 immunization. Sci Rep. 2016;6: 19234. doi:10.1038/srep19234
- 799 33. Leneghan DB, Miura K, Taylor IJ, Li Y, Jin J, Brune KD, et al. Nanoassembly routes  
800 stimulate conflicting antibody quantity and quality for transmission-blocking malaria  
801 vaccines. Sci Rep. 2017;7: 3811. doi:10.1038/s41598-017-03798-3
- 802 34. Huang W-C, Deng B, Lin C, Carter KA, Geng J, Razi A, et al. A Malaria Vaccine  
803 Adjuvant Based on Recombinant Antigen Binding to Liposomes. Nat Nanotechnol.  
804 2018;12: 1174–1181. doi:10.1038/s41565-018-0271-3
- 805 35. Kumar R, Ray PC, Datta D, Bansal GP, Angov E, Kumar N. Nanovaccines for malaria  
806 using Plasmodium falciparum antigen Pfs25 attached gold nanoparticles. Vaccine.  
807 2015;33: 5064–5071. doi:10.1016/j.vaccine.2015.08.025
- 808 36. Carter R, Coulson A, Bhatti S, Taylor BJ, Elliott JF. Predicted disulphide-bonded  
809 structures for three uniquely related proteins of Plasmodium falciparum, Pfs230,  
810 Pfs48/45 and pf12. Mol Biochem Parasitol. 1995;71: 203–210.
- 811 37. Gerloff DL, Creasey A, Maslau S, Carter R. Structural models for the protein family  
812 characterized by gamete surface protein Pfs230 of Plasmodium falciparum. Proc Natl  
813 Acad Sci U S A. 2005;102: 13598–13603. doi:0502378102  
814 [pii]r10.1073/pnas.0502378102
- 815 38. MacDonald NJ, Nguyen V, Shimp R, Reiter K, Herrera R, Burkhardt M, et al. Structural  
816 and immunological characterization of recombinant 6-cysteine domains of the  
817 plasmodium falciparum sexual stage protein Pfs230. J Biol Chem. 2016;291: 19913–  
818 19922. doi:10.1074/jbc.M116.732305
- 819 39. Tachibana M, Wu Y, Iriko H, Muratova O, MacDonald NJ, Sattabongkot J, et al. N-  
820 terminal prodomain of Pfs230 synthesized using a cell-free system is sufficient to  
821 induce complement-dependent malaria transmission-blocking activity. Clin Vaccine  
822 Immunol. 2011;18: 1343–4350. doi:10.1128/CVI.05104-11
- 823 40. Nikolaeva D, Draper SJ, Biswas S. Toward the development of effective transmission-  
824 blocking vaccines for malaria. Expert Rev Vaccines. 2015;14: 653–680.  
825 doi:10.1586/14760584.2015.993383
- 826 41. Anderson DA, Grgacic EVL. Viral vectors expressing fusion of viral large envelope  
827 protein and protein of interest. Patent WO2004092387A1. 2004. doi:10.1016/j.(73)
- 828 42. Grgacic EVL, Anderson DA, Loke P, Anders R. Recombinant proteins and virus-like  
829 particles comprising L and S polypeptides of avian hepadnaviridae and methods,  
830 nucleic acid constructs, vectors and host cells for producing same. Patent  
831 WO2008025067A1. 2006.
- 832 43. Suh SO, Zhou JJ. Methylophilic yeasts near Ogataea (Hansenula) polymorpha: A  
833 proposal of Ogataea angusta comb. nov. and Candida parapolyomorpha sp. nov.  
834 FEMS Yeast Res. 2010;10: 631–638. doi:10.1111/j.1567-1364.2010.00634.x
- 835 44. Wetzel D, Rolf T, Suckow M, Kranz A, Barbian A, Chan JA, et al. Establishment of a

- 836 yeast-based VLP platform for antigen presentation. *Microb Cell Fact.* 2018;17: 1–17.  
837 doi:10.1186/s12934-018-0868-0
- 838 45. Roldão A, Mellado MCM, Castilho LR, Carrondo MJT, Alves PM. Virus-like particles in  
839 vaccine development. *Expert Rev Vaccines.* 2010;9: 1149–1176.  
840 doi:10.1586/erv.10.115
- 841 46. Degelmann A, Müller F, Sieber H, Jenzelewski V, Suckow M, Strasser AWM, et al.  
842 Strain and process development for the production of human cytokines in *Hansenula*  
843 *polymorpha*. *FEMS Yeast Res.* 2002;2: 349–361. doi:10.1016/S1567-1356(02)00096-  
844 X
- 845 47. Bertani G. Studies on lysogenesis. I. The mode of phage liberation by lysogenic  
846 *Escherichia coli*. *J Bacteriol.* 1951;62: 293–300. doi:citeulike-article-id:149214
- 847 48. Lahtchev KL, Semenova VD, Tolstorukov II, Van der Klei I, Veenhuis M. Isolation and  
848 properties of genetically defined strains of the methylotrophic yeast *Hansenula*  
849 *polymorpha* CBS4732. *Arch Microbiol.* 2002;177: 150–158. doi:10.1007/s00203-001-  
850 0370-6
- 851 49. Faber KN, Haima P, Harder W, Veenhuis M, Ab G. Highly-efficient  
852 electrotransformation of the yeast *Hansenula polymorpha*. *Curr Genet.* 1994;25: 305–  
853 310. doi:10.1007/BF00351482
- 854 50. Guengerich L, Kang HA, Behle B, Gellissen G, Suckow M. A platform for heterologous  
855 gene expression based on the methylotrophic yeast *Hansenula polymorpha*. In: Kueck  
856 U, editor. *Genetics and Biotechnology*. Berlin: Springer; 2004. pp. 273–287.
- 857 51. Schaefer S, Piontek M, Ahn SJ, Papendieck A, Janowicz ZA, Timmermans I, et al.  
858 Recombinant hepatitis B vaccines—disease characterization and vaccine production.  
859 In: Gellissen G, editor. *Hansenula polymorpha—biology and applications*. Weinheim:  
860 Wiley-VCH; 2002. pp. 175–210.
- 861 52. Lünsdorf H, Gurramkonda C, Adnan A, Khanna N, Rinas U. Virus-like particle  
862 production with yeast: Ultrastructural and immunocytochemical insights into *Pichia*  
863 *pastoris* producing high levels of the Hepatitis B surface antigen. *Microb Cell Fact.*  
864 2011;10: 1–16. doi:10.1186/1475-2859-10-48
- 865 53. Frings CS, Fendley TW, Dunn RT, Queen CA. Improved determination of total serum  
866 lipids by the sulfo-phospho-vanillin reaction. *Clin Chem.* 1972;18: 673–674.
- 867 54. Pink M, Verma N, Rettenmeier AW, Schmitz-Spanke S. CBB staining protocol with  
868 higher sensitivity and mass spectrometric compatibility. *Electrophoresis.* 2010;31:  
869 593–598. doi:10.1002/elps.200900481
- 870 55. Miura K, Takashima E, Deng B, Tullo G, Diouf A, Moretz SE, et al. Functional  
871 comparison of plasmodium falciparum transmission-blocking vaccine candidates by  
872 the standard membrane-feeding assay. *Infect Immun.* 2013;81: 4377–4382.  
873 doi:10.1128/IAI.01056-13
- 874 56. Grgacic EVL, Anderson DA. St, a truncated envelope protein derived from the S  
875 protein of duck hepatitis B virus, acts as a chaperone for the folding of the large  
876 envelope protein. *J Virol.* 2005;79: 5346–5352. doi:10.1128/JVI.79.9.5346-5352.2005
- 877 57. Pugh JC, Di Q, Mason WS, Simmons H. Susceptibility to duck hepatitis B virus  
878 infection is associated with the presence of cell surface receptor sites that efficiently  
879 bind viral particles. *J Virol.* 1995;69: 4814–4822.
- 880 58. Mulder B, Roeffen W, Sauerwein R, Tchuinkam T, Boudin C, Verhave JP. Anti-Pfs25  
881 monoclonal antibody 32F81 blocks transmission from *Plasmodium falciparum*  
882 gametocyte carriers in Cameroon. *Trans R Soc Trop Med Hyg.* 1996;90: 195.

- 883           doi:10.1016/S0035-9203(96)90139-X
- 884   59.   Stura EA, Kang AS, Stefanko RS, Calvo JC, Kaslow DC, Satterthwait AC.  
885       Crystallization, sequence and preliminary crystallographic data for transmission-  
886       blocking anti-malaria Fab 4B7 with cyclic peptides from the Pfs25 protein of *P.*  
887       *falciparum*. *Acta Crystallogr Sect D Biol Crystallogr*. 1994;50: 535–542.  
888       doi:10.1107/S0907444994001356
- 889   60.   Cova L, Abdul F, Buronfosse T. Avihepadnavirus. In: Tidona C, Darai G, editors. *The*  
890       *Springer Index of Viruses*. Berlin: Springer; 2011. pp. 615–624.
- 891   61.   Mason WS, Gerlich WH, Taylor JM, Kann M, Mizokami T, Loeb D, et al.  
892       Hepadnaviridae. In: King AMQ, Adams AJ, Carstens EB, Lekowitz EJ, editors. *Virus*  
893       *taxonomy*. Amsterdam: Elsevier; 2013. pp. 445–455.
- 894   62.   Stowers AW, Keister DB, Muratova O, Kaslow DC. A region of *Plasmodium falciparum*  
895       antigen Pfs25 that is the target of highly potent transmission-blocking antibodies.  
896       *Infect Immun*. 2000;68: 5530–5538. doi:10.1128/IAI.68.10.5530-5538.2000
- 897   63.   Farrance CE, Rhee A, Jones RM, Musiychuk K, Shamloul M, Sharma S, et al. A plant-  
898       produced Pfs230 vaccine candidate blocks transmission of *Plasmodium falciparum*.  
899       *Clin Vaccine Immunol*. 2011;18: 1351–1357. doi:10.1128/CVI.05105-11
- 900   64.   Gordon DM, Mc Govern TW, Krzych U, Cohen JC, Schneider I, La Chance R, et al.  
901       Safety, immunogenicity, and efficacy of a recombinantly produced plasmodium  
902       *falciparum* circumsporozoite protein-hepatitis b surface antigen subunit vaccine. *J*  
903       *Infect Dis*. 1995;171: 1576–1585. doi:10.1093/infdis/171.6.1576
- 904   65.   Gellissen G, Kunze G, Gaillardin C, Cregg JM, Berardi E, Veenhuis M, et al. New  
905       yeast expression platforms based on methylotrophic *Hansenula polymorpha* and  
906       *Pichia pastoris* and on dimorphic *Arxula adenivorans* and *Yarrowia lipolytica* - A  
907       comparison. *FEMS Yeast Res*. 2005;5: 1079–1096. doi:10.1016/j.femsyr.2005.06.004
- 908   66.   Fuenmayor J, Gòdia F, Cervera L. Production of virus-like particles for vaccines. *N*  
909       *Biotechnol*. 2017;39: 174–180. doi:10.1016/j.nbt.2017.07.010
- 910   67.   Ahmad M, Hirz M, Pichler H, Schwab H. Protein expression in *Pichia pastoris*: Recent  
911       achievements and perspectives for heterologous protein production. *Appl Microbiol*  
912       *Biotechnol*. 2014;98: 5301–5317. doi:10.1007/s00253-014-5732-5
- 913   68.   Liu F, Wu X, Li L, Liu Z, Wang Z. Use of baculovirus expression system for generation  
914       of virus-like particles: Successes and challenges. *Protein Expr Purif*. 2013;90: 104–  
915       116. doi:10.1016/j.pep.2013.05.009
- 916   69.   Heijntink RA, Bergen P Van, Melber K, Janowicz ZA, Osterhaus ADME. Hepatitis B  
917       surface antigen (HBsAg) derived from yeast cells (*Hansenula polymorpha*) used to  
918       establish an influence of antigenic subtype (adw2, adr, ayw3) in measuring the  
919       immune response after vaccination. *Vaccine*. 2002;20: 2191–2196.  
920       doi:10.1016/S0264-410X(02)00145-7
- 921   70.   Janowicz ZA, Melber K, Merckelbach A, Jacobs E, Harford N, Comberbach M, et al.  
922       Simultaneous expression of the S and L surface antigens of hepatitis B, and formation  
923       of mixed particles in the methylotrophic yeast, *Hansenula polymorpha*. *Yeast*. 1991;7:  
924       431–443. doi:10.1002/yea.320070502
- 925   71.   Romanos MA, Scorer CA, Clare JJ. Foreign gene expression in yeast: a review.  
926       *Yeast*. 1992;8: 423–488. doi:10.1002/yea.320080602
- 927   72.   Faber KN, Harder W, Ab G, Veenhuis M. Methylotrophic yeasts as factories for the  
928       production of foreign proteins. *Yeast*. 1995;11: 1331–1344.  
929       doi:10.1002/yea.320111402

- 930 73. Gellissen G, Hollenberg CP. Application of yeasts in gene expression studies: A  
931 comparison of *Saccharomyces cerevisiae*, *Hansenula polymorpha* and *Kluyveromyces*  
932 *lactis* - A review. *Gene*. 1997;190: 87–97. doi:10.1016/S0378-1119(97)00020-6
- 933 74. Gellissen G, Hollenberg C, Janowicz Z. Gene expression in methylotrophic yeasts. In:  
934 Smith A, editor. *Gene expression in recombinant microorganisms*. 1st ed. New York:  
935 Marcel Dekker; 1995. pp. 195–239.
- 936 75. Swinnen S, Klein M, Carrillo M, McInnes J, Nguyen HTT, Nevoigt E. Re-evaluation of  
937 glycerol utilization in *Saccharomyces cerevisiae*: Characterization of an isolate that  
938 grows on glycerol without supporting supplements. *Biotechnol Biofuels*. 2013;157: 1–  
939 12. doi:10.1186/1754-6834-6-157
- 940 76. Jenzelewski V. Fermentation and primary product recovery. In: Gellissen G, editor.  
941 *Hansenula polymorpha—biology and applications*. Weinheim: Wiley-VCH; 2002. pp.  
942 156–174.
- 943 77. Mayer AF, Hellmuth K, Schlieker H, Lopez-Ulibarri R, Oertel S, Dahlems U, et al. An  
944 expression system matures: A highly efficient and cost-effective process for phytase  
945 production by recombinant strains of *Hansenula polymorpha*. *Biotechnol Bioeng*.  
946 1999;63: 373–381. doi:10.1002/(SICI)1097-0290(19990505)63:3<373::AID-  
947 BIT14>3.0.CO;2-T
- 948 78. Kang HA, Sohn JH, Choi ES, Chung BH, Yu MH, Rhee SK. Glycosylation of human  
949  $\alpha$ 1-antitrypsin in *Saccharomyces cerevisiae* and methylotrophic yeasts. *Yeast*.  
950 1998;14: 371–381. doi:10.1002/(SICI)1097-0061(19980315)14:4<371::AID-  
951 YEA231>3.0.CO;2-1
- 952 79. Kim MW, Rhee SK, Kim JY, Shimma YI, Chiba Y, Jigami Y, et al. Characterization of  
953 N-linked oligosaccharides assembled on secretory recombinant glucose oxidase and  
954 cell wall mannoproteins from the methylotrophic yeast *Hansenula polymorpha*.  
955 *Glycobiology*. 2004;14: 243–251. doi:10.1093/glycob/cwh030
- 956
- 957



958  
959  
960  
961  
962  
963  
964  
965  
966  
967  
968  
969  
970  
971  
972  
973  
974  
975  
976  
977  
978

## Supplementary material

of the manuscript entitled

### **Display of malaria transmission-blocking antigens on chimeric DHBV-derived virus-like particles produced in *Hansenula polymorpha***

Authors:

Wetzel, David; Chan, Jo-Anne; Suckow, Manfred; Barbian, Andreas; Weniger, Michael;  
Jenzelewski, Volker; Reiling, Linda; Richards, Jack S; Anderson, David A; Kouskousis, Betty;  
Palmer, Catherine; Hanssen, Eric; Schembecker, Gerhard; Merz, Juliane; Beeson, James G;  
Piontek, Michael

## 979 **Section S1: Additional data on the chimeric Pfs25-dS/dS VLP**

### 980 **S1.1 Cross-reactivity of anti-Pfs25 antibodies**

981 Fig 1 A of the main manuscript shows Western blot analyses on the chimeric Pfs25-dS/dS VLP  
982 (lanes 3 to 6). Cross reactivity of the anti-Pfs25 antibody with the dS scaffold protein was  
983 observed (Fig 1A, lanes 5 and 6). Therefore, Western blot analysis was repeated (shown in  
984 Fig S 1) with two different chimeric VLP preparations originating from two different  
985 *H. polymorpha* cell lines producing different amounts of two target proteins dS and Pfs25-dS.  
986 The blocking of the membrane was modified compared to the methodology described in the  
987 main manuscript. Instead of the Roti Block reagent (Carl Roth GmbH, Karlsruhe, Germany),  
988 3 % (w/v) dry milk (in PBST) were applied as for the Pfs230-related Western blots. With this  
989 modified procedure we did not observe cross-reactivity of the anti-Pfs25 antibody with the dS  
990 in Western blot.

991 Lanes 2 and 4 in Fig S1 represent the actual Pfs25-dS/dS VLP preparation discussed in the  
992 main manuscript whereas lanes 1 and 3 represent a substantially lower concentrated  
993 Pfs25-dS/dS VLP preparation originating from a different *H. polymorpha* cell line. In both VLP  
994 preparation the dS was detected by the anti-dS antibody (lanes 1 and 2). However, only for  
995 the preparation applied to lanes 2 and 4 the presence of the Pfs25-dS fusion protein was  
996 substantiated by the anti-Pfs25 antibody. Potentially, the Pfs25-dS fusion protein content in  
997 the sample applied to lanes 1 and 3 is below the detection limit. However, cross reactivity with  
998 the VLP scaffold protein dS was not observed for neither of the samples most likely due to the  
999 altered Western blot procedure compared to the analysis shown in the main manuscript  
1000 (Fig 1 A).

1001

1002

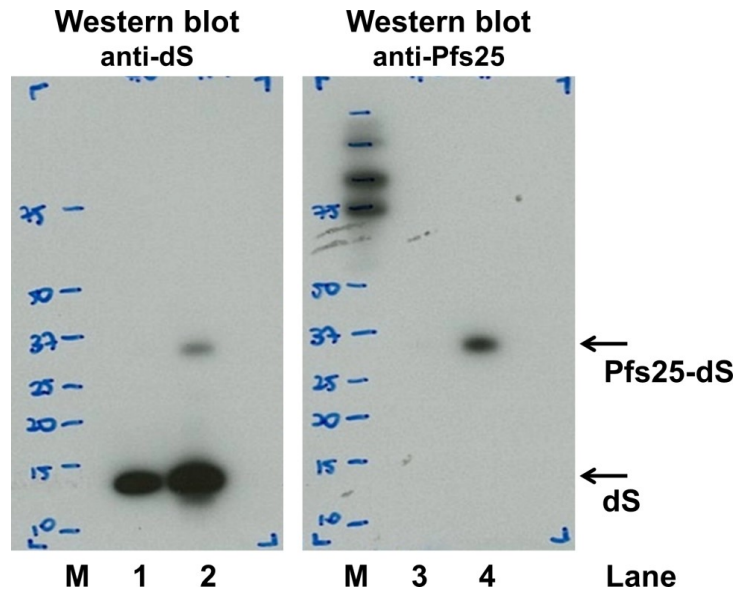

1003

1004 **Figure S 1 Repetition of Western blot analyses on chimeric Pfs25-dS/dS VLP.** Chimeric Pfs25-dS/dS VLP  
1005 preparations obtained from two different *H. polymorpha* cell lines were applied. Lanes 2 and 4: the Pfs25-dS/dS  
1006 VLP preparation discussed in the main manuscript. Lanes 1 and 3: A lower concentrated VLP preparation derived  
1007 from a different cell line expressing lower levels of dS and Pfs25-dS. Left: Membrane probed with anti-dS 7C12  
1008 mAb. Right: Membrane probed with anti-Pfs25 mAb 32F81 and analyzed on the same membrane. M: molecular  
1009 weight marker

1010



## 1011 **S1.2 Reduced product solubilization at elevated Pfs25-dS expression levels**

1012 To overcome the low incorporation ratio of Pfs25-dS in the chimeric Pfs25-dS/dS VLP isolated  
1013 from strain RK#097, additional strains co-expressing dS and Pfs25-dS were generated and  
1014 screened for higher productive than strain RK#097 on the cell lysate level. One of them is the  
1015 strain designated as DW#044. A side-by-side Western blot analysis of strain RK#097 and  
1016 DW#044 is shown in Fig S 2. Cell pellets of the two strains were resuspended OD<sub>600</sub>  
1017 normalized in cell disruption buffer (25 mM Na-phosphate buffer, 2 mM EDTA, 0.5 % (w/v)  
1018 Tween 20, pH 8.0). Cell disruption was carried out in 1.5 mL reaction tubes on a shaker (basic  
1019 Vibrax® shaker, IKA®-Werke, Staufen, Germany) at maximal frequency for 30 min at 4 °C  
1020 using glass beads (0.5–0.7 mm, Willy A. Bachofen, Nidderau-Heldenberg, Germany). One part  
1021 of the resulting crude cell lysates was analyzed directly by anti-dS Western blot (lanes 1 and  
1022 4). The rest of the lysates was separated into soluble protein fraction (analyzed in lanes 3 and  
1023 6) and insoluble material (analyzed in lanes 2 and 5) by centrifugation (15 min, 13.000 g, 4 °C).  
1024 The insoluble material was resuspended in distilled water volume-normalized to the volume of  
1025 the centrifuged cell lysate prior to Western blot analysis. The comparison of lane 1 to lane 4  
1026 indicates higher productivity of the strain DW#044 compared to strain RK#097 regarding the  
1027 fusion protein Pfs25-dS. However, in contrast to the material obtained from strain RK#097, the  
1028 majority of the product proteins (dS and Pfs25-dS) produced by strain DW#044 was detected  
1029 in the insoluble material (lane 5). Only a minority of the product was found in the soluble protein  
1030 fraction (lane 6). The higher productivity on the cell lysate level (compare lanes 1 and 3) did  
1031 not lead to higher product yields in the soluble protein fraction (compare lanes 3 and 6).

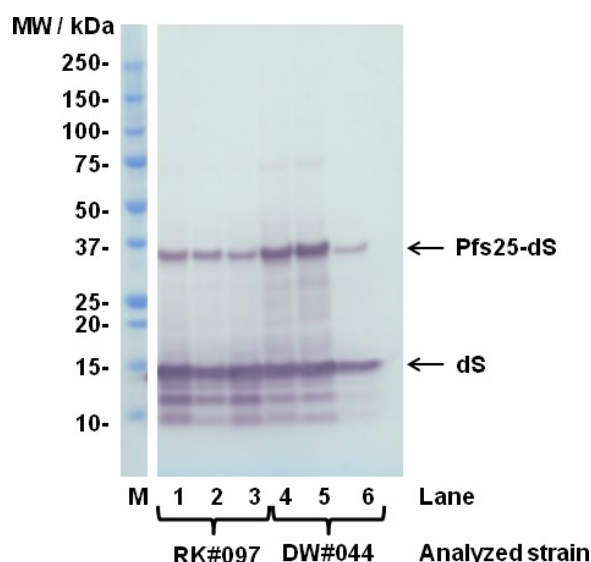

1032  
1033 **Figure S 2 Side-by-side Western blot analysis of strains RK#097 and DW#044 co-producing the dS and**  
1034 **Pfs25-dS.** Cell lysates (lanes 1 and 4), insoluble materials (lanes 2 and 5) and soluble protein fractions (lanes 3  
1035 and 6) obtained from equal amounts of cells were applied to the gel. The membrane was probed with anti-dS mAb  
1036 7C12. M: molecular weight marker.

1037 This was analyzed in more detail by anti-dS Western blot analyses applying dilution series of  
1038 the crude cell lysates and the soluble protein fractions (Fig S 3). The methodology of Western  
1039 blot is only a semi-quantitative approach and the results have to be treated with caution.  
1040 However, the decreased solubilization of the target proteins in case of the strain DW#044 (Fig  
1041 S 3 B) is obvious compared to the strain RK#097 (Fig S 3 A). Based on analysis by  
1042 densitometry approximately 54 % of the target proteins are solubilized in case of the strain  
1043 RK#097 whereas only ~20 % of the target proteins were solubilized in case of the strain  
1044 DW#044.

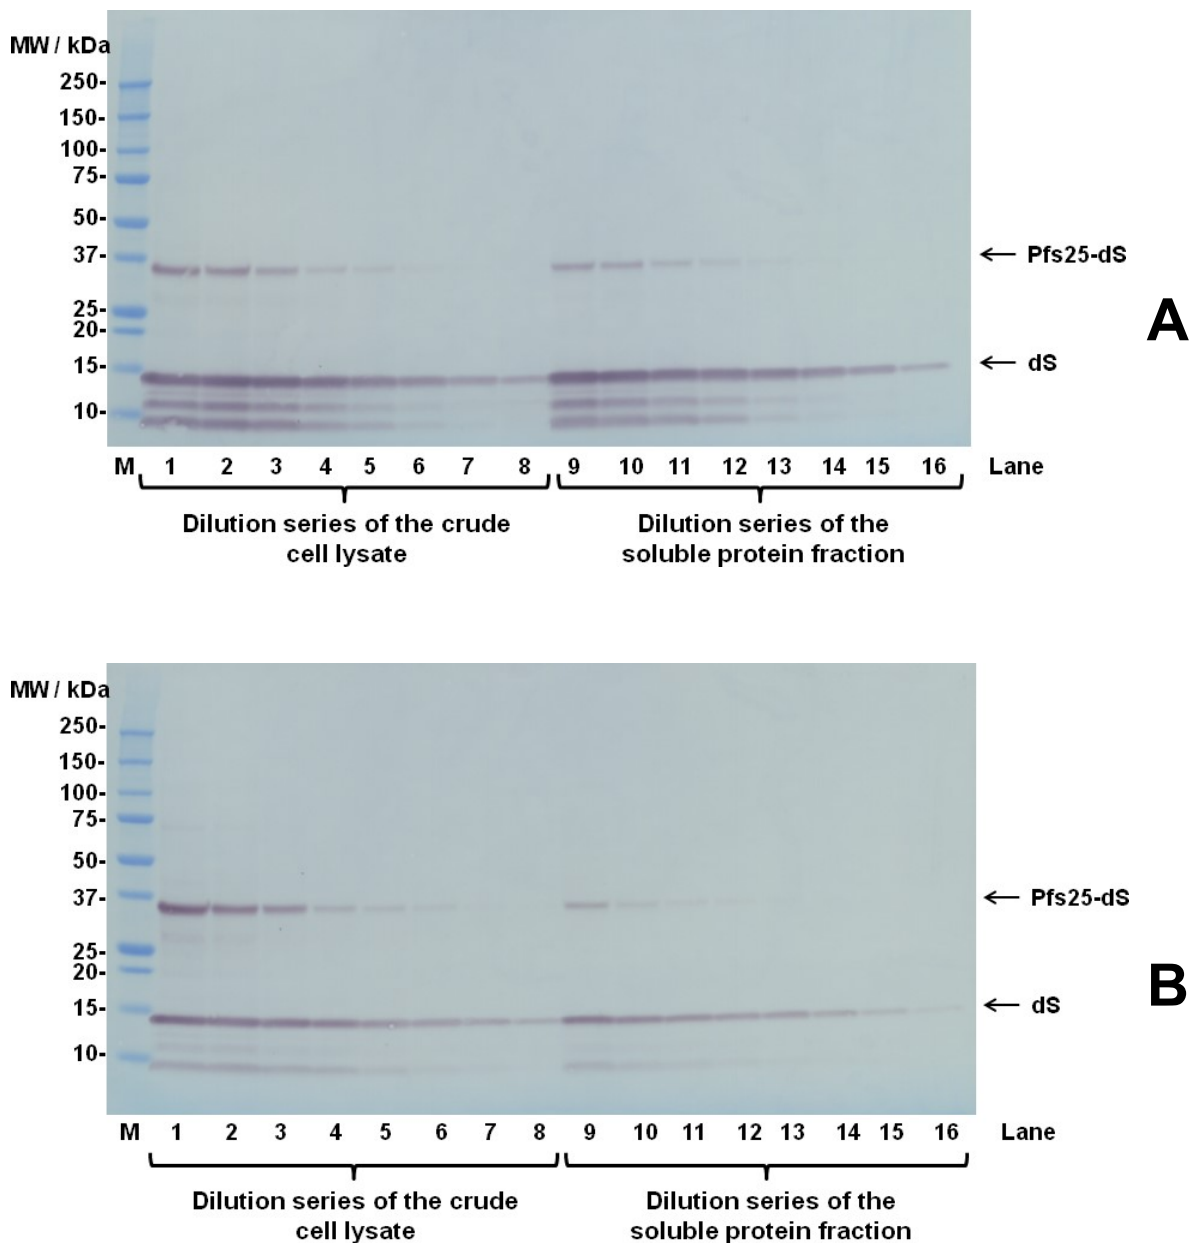

1045 **Figure S 3 Western blot analyses of crude cell lysates and soluble protein fractions of strains RK#097 (A)**  
1046 **and DW#044 (B).** The fractions were applied as dilution series (factor 2 steps). The membrane was probed with  
1047 anti-dS mAb 7C12. M: molecular weight marker.

## 1048 Section S2: Additional data on the chimeric Pfs230c-dS/dS VLP

### 1049 S2.1 Reactivity of different anti-Pfs230 immunoreagents with Pfs230c-dS/dS VLP in 1050 ELISA

1051 During the development of methodologies to analyze the Pfs230c-dS/dS VLP, different primary  
1052 immunoreagents were tested. The mouse polyclonal antibody was found to be substantially  
1053 more reactive than the 1B3 monoclonal antibody (Fig S 4).

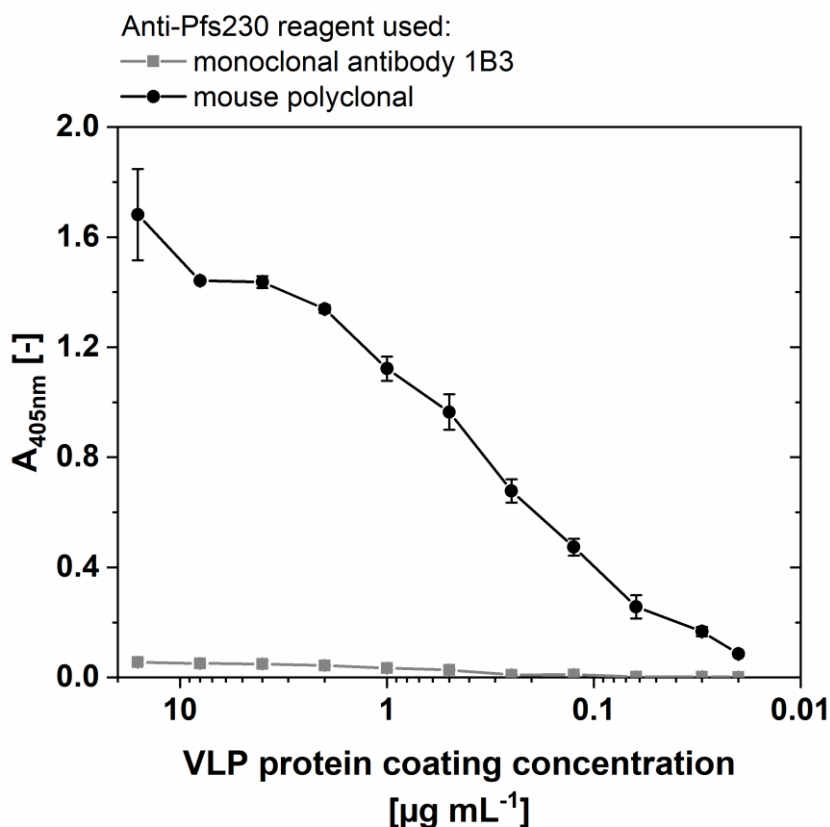

1054

1055 **Figure S 4 ELISA data on purified Pfs230c-dS/dS VLP derived from strain RK#114.** Titration of VLP coating  
1056 concentration. Primary antibodies were applied as 10 $\mu\text{g/mL}$  for both the mouse polyclonal and monoclonal 1B3).  
1057 Error bars indicate standard deviation based on triplicates.

1058

### 1059 S2.2 Anti-HCP Western blot

1060 Anti-HCP Western blot was performed with the Pfs230c-dS/dS VLP preparation (Fig S 5, lane  
1061 1). The immunostaining of the membrane was performed as follows: Blocking with 1.5 % (w/v)  
1062 powdered milk in PBS containing 0.05 % Tween 20 over-night at 4 °C. A polyclonal antiserum  
1063 isolated from goats immunized with *H. polymorpha* HCP (Artes Biotechnology, Langenfeld,  
1064 Germany/BioGenes, Berlin, Germany) was used as primary immunoreagent. The detection

1065 system was completed with a rabbit anti-goat IgG AP conjugate (BioRad, München, Germany)  
1066 in combination with BCIP-NBT solution.  
1067 A subset of the bands detected in the Coomassie stained PAA gel (Fig S 5, lane 2) between  
1068 the dS and the fusion protein was reactive with the polyclonal anti-HCP serum. Especially, the  
1069 most prominent signals apart from the dS and the Pfs230c-dS in lane 2 could be identified as  
1070 HCP in lane 1. Cross reactivity of the immunoreagents with the product-related proteins was  
1071 not observed.  
1072

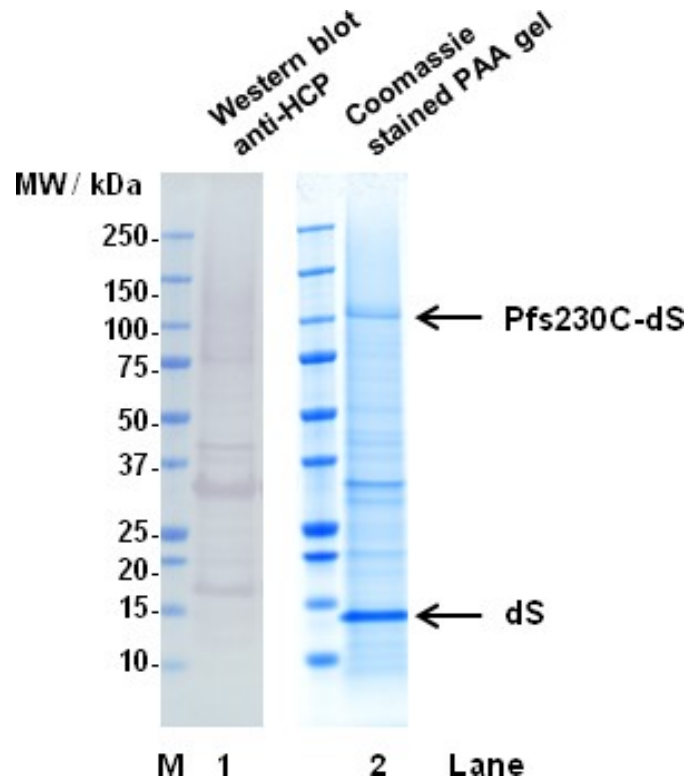

1073  
1074 **Figure S 5 Anti-HCP Western blot analyses of purified Pfs230c-dS/dS VLP derived from strain RK#114.** The  
1075 purified Pfs230c-dS/dS VLP preparation was analyzed by Western blot probed with anti-HCP serum (lane 1, 10 µg  
1076 protein loaded) or Coomassie stained PAA gel (lane 2, 12 µg protein loaded). M: molecular weight marker.

1077

1078

1079 **Author contributions statement**

1080 Conceptualization, DW, JAC, JB, MP and DA; Methodology, DW, JAC, AB, EH, BK, CP, VJ,  
1081 MW, MS, DA and MP; Investigation, DW, JAC, LR and AB; Administration, JB, MP, VJ, JR and  
1082 DA; Writing – Original Draft, DW; Writing – Review and Editing, DW, JAC, MP, JB, MS, VJ and  
1083 JM; Funding Acquisition, JB, MP and DA. Supervision, MP, JB, VJ, JM and GS.

1084

1085 **Funding**

1086 PATH Malaria Vaccine Initiative; National Health and Medical Research Council of Australia  
1087 (Senior Research Fellowship and Program Grant to JB). Burnet Institute is supported by  
1088 funding from the NHMRC Independent Research Institutes Infrastructure Support Scheme and  
1089 a Victorian State Government Operational Infrastructure grant.

1090 ARTES Biotechnology GmbH provided support in the form of salaries for authors DW, MS,  
1091 MW, VJ and MP. MP is founder of ARTES Biotechnology GmbH and Managing Director and  
1092 was involved in the study design, data analysis, decision to publish, and preparation of the  
1093 manuscript as a supervisor as articulated in the ‘author contributions’ section. Most of the  
1094 research presented in this work was performed in the company’s facilities.

1095 Juliane Merz is employed by Evonik Technology & Infrastructure GmbH. Evonik Technology  
1096 & Infrastructure GmbH provided support in the form of salary for author JM, but did not have  
1097 any additional role in the study design, data collection and analysis, or preparation of the  
1098 manuscript. Evonik Technology & Infrastructure GmbH expressly agreed on publishing the  
1099 manuscript. The specific roles of JM are articulated in the ‘author contributions’ section.

1100

1101 **Acknowledgements**

1102 The authors gratefully acknowledge Sylvia Denter, Paul Gilson, Heribert Helgers, Renske  
1103 Klassen, Dr. Andreas Kranz, Christine Langer, Dr. Joachim Leitsch, Thomas Rohr, and  
1104 Elisabeth Wesbuer for technical and academic assistance. The following reagent was obtained  
1105 through BEI Resources NIAID, NIH: Monoclonal Antibody 4B7 Anti-Plasmodium falciparum  
1106 25 kDa Gamete Surface Protein (Pfs25), MRA-28, contributed by David C. Kaslow.

1107 Monoclonal antibody 32F81 was kindly provided by PATH Malaria Vaccine Initiative.

1108 Polyclonal mouse antibody was kindly provided by Carole Long and Kazutoyo Miura, NIH.

1109

1110

1111 **Competing interests**

1112 The authors VJ, MP, MS, DW and MW are associated with ARTES Biotechnology GmbH which

1113 owns the license for the VLP technology (patents cited as references [41] and [42]): Viral

1114 vectors expressing fusion of viral large envelope protein and protein of interest (No.

1115 WO2004092387A1). Recombinant proteins and virus-like particles comprising L and S

1116 polypeptides of avian hepadnaviridae and methods, nucleic acid constructs, vectors and host

1117 cells for producing same (No. WO2008025067A1).

1118 Author JM is affiliated with Evonik Technology & Infrastructure GmbH.

1119 There are no further patents, products in development or marketed products to declare. This

1120 does not alter our adherence to all the PLOS ONE policies on sharing data and materials.

1121

1122 **Data Availability**

1123 All relevant data are within the paper.
